# Supplementary material
Source: PubMed Central journal article supplement (PMC3615553)
Supplement: NIHMS449134-supplement-Table_S1.pdf [file NIHMS449134-supplement-Table_S1.pdf]

## Supplementary Table 1

### Normalized Enrichment Scores from GSEA for the Puberty Dataset

| <u>NAME</u>                               | <u>NES</u> | <u>NOM p-val</u> | <u>FDR q-val</u> |
|-------------------------------------------|------------|------------------|------------------|
| VOXPPOS                                   | 1.60       | 0.04153          | 1.00             |
| GATA1_WELCH                               | 1.56       | 0.00000          | 1.00             |
| Krebs_TCA_Cycle                           | 1.52       | 0.02308          | 1.00             |
| KREBS_TCA_CYCLE                           | 1.52       | 0.02351          | 1.00             |
| MYC_DATABASE_UP                           | 1.49       | 0.03656          | 0.74             |
| MYC_293_UP                                | 1.46       | 0.00633          | 0.75             |
| RAPAMYCIN_DOWN_PENG                       | 1.42       | 0.04192          | 0.92             |
| tpoPathway                                | 1.40       | 0.03691          | 0.85             |
| TCA                                       | 1.32       | 0.00000          | 0.79             |
| TNFA_5ENDOTHELIAL_DOWN                    | -1.72      | 0.00177          | 0.48             |
| PANCREAS_CHR12_AGUIRRE                    | -1.60      | 0.00698          | 1.00             |
| KRAS_TOP100_KNOCKDOWN_CORDERO             | -1.51      | 0.01570          | 1.00             |
| CELL_ADHESION                             | -1.49      | 0.00000          | 1.00             |
| PASSERINI_ADHESION                        | -1.48      | 0.03488          | 1.00             |
| EMT_DOWN_JECHLINGER                       | -1.47      | 0.02006          | 1.00             |
| cdc42racPathway                           | -1.47      | 0.04746          | 1.00             |
| Urea cycle and metabolism of amino groups | -1.46      | 0.02235          | 0.99             |
| BREAST_CANCER_ESTROGEN_SIGNALLING         | -1.43      | 0.01301          | 0.97             |
| BRENTANI_CELL_ADHESION                    | -1.41      | 0.01211          | 1.00             |
| MOUSE_E2F1_UP                             | -1.40      | 0.02742          | 1.00             |
| MOUSE_DENA_UP                             | -1.39      | 0.02194          | 1.00             |
| BRENTANI_PROTEIN_MODIFICATION             | -1.38      | 0.01289          | 0.94             |
| CELL_ADHESION_MOLECULE_ACTIVITY           | -1.38      | 0.00152          | 0.90             |
| CELL_ADHESION_RECEPTOR_ACTIVITY           | -1.37      | 0.03947          | 0.88             |
| ER_DOWN_FRASOR                            | -1.35      | 0.01986          | 0.85             |

### Normalized Enrichment Scores from GSEA for Lactation and Involution

| <u>NAME</u>                    | <u>NES</u> | <u>NOM p-val</u> | <u>FDR q-val</u> |
|--------------------------------|------------|------------------|------------------|
| ANDROGEN_UP_NELSON             | 1.950      | 0.000            | 0.031            |
| MYC_P493_TET_UP                | 1.804      | 0.000            | 0.052            |
| MYC_DATABASE_UP                | 1.826      | 0.000            | 0.053            |
| ANDROGEN_REGULATED_GENES       | 1.851      | 0.000            | 0.060            |
| LEUCINE_DOWN_PENG              | 1.723      | 0.006            | 0.111            |
| MYELIN_DOWN_LE                 | 1.689      | 0.000            | 0.132            |
| GLUTAMINE_DOWN_PENG            | 1.664      | 0.006            | 0.146            |
| TARTE_PC                       | 1.631      | 0.020            | 0.158            |
| Pyruvate metabolism            | 1.635      | 0.018            | 0.171            |
| Butanoate metabolism           | 1.578      | 0.035            | 0.207            |
| RAPAMYCIN_DOWN_PENG            | 1.565      | 0.016            | 0.209            |
| PEL_UP_KLEIN                   | 1.578      | 0.010            | 0.226            |
| Glycolysis_and_Gluconeogenesis | 1.540      | 0.034            | 0.235            |
| Circadian_Exercise             | 1.526      | 0.005            | 0.246            |
| g1Pathway                      | -1.952     | 0.000            | 0.048            |

| <b><u>NAME</u></b>                 | <b><u>NES</u></b> | <b><u>NOM p-val</u></b> | <b><u>FDR q-val</u></b> |
|------------------------------------|-------------------|-------------------------|-------------------------|
| RADIATION_SENSITIVITY              | -1.934            | 0.000                   | 0.030                   |
| raccycdPathway                     | -1.925            | 0.000                   | 0.025                   |
| CHEN_LUNG_SURVIVAL                 | -1.901            | 0.000                   | 0.027                   |
| MOUSE_ACOX1_UP                     | -1.766            | 0.000                   | 0.126                   |
| cellcyclePathway                   | -1.739            | 0.009                   | 0.138                   |
| DRUG_RESISTANCE_AND_METABOLISM     | -1.728            | 0.000                   | 0.137                   |
| KRAS_TOP100_KNOCKDOWN_CORDERO      | -1.698            | 0.002                   | 0.161                   |
| P53_UP_KANNAN                      | -1.689            | 0.005                   | 0.157                   |
| BRENTANI_TRANSCRIPTION_FACTORS     | -1.679            | 0.000                   | 0.156                   |
| COPD_DOWN_NING                     | -1.629            | 0.004                   | 0.230                   |
| TNFA_5ENDOTHELIAL_DOWN             | -1.615            | 0.002                   | 0.240                   |
| p53hypoxiaPathway                  | -1.614            | 0.017                   | 0.224                   |
| BRENTANI_IMMUNE_FUNCTION           | -1.612            | 0.023                   | 0.211                   |
| ICHIBA_GVHD                        | -1.611            | 0.026                   | 0.199                   |
| ER_DOWN_FRASOR                     | -1.600            | 0.000                   | 0.205                   |
| TNFA_5ENDOTHELIAL_UP               | -1.595            | 0.004                   | 0.201                   |
| RAS_STROMA_DOWN_CROONQUIST         | -1.590            | 0.016                   | 0.199                   |
| PASSERINI_APOPTOSIS                | -1.586            | 0.005                   | 0.195                   |
| NFKB_UP_HINATA                     | -1.571            | 0.015                   | 0.213                   |
| il6Pathway                         | -1.558            | 0.042                   | 0.226                   |
| IL6_BROCKE                         | -1.557            | 0.003                   | 0.217                   |
| CBF_MYH_ROSS                       | -1.557            | 0.044                   | 0.208                   |
| BRENTANI_PROTEIN_MODIFICATION      | -1.557            | 0.003                   | 0.200                   |
| IL6_STROMA_UP_CROONQUIST           | -1.556            | 0.019                   | 0.192                   |
| BMYB_MORPHOLINO_UP_SHEPARD         | -1.546            | 0.000                   | 0.199                   |
| ccr5Pathway                        | -1.533            | 0.019                   | 0.214                   |
| CELL_MOTILITY                      | -1.524            | 0.024                   | 0.221                   |
| SURVIVAL_ALL_POOR                  | -1.520            | 0.058                   | 0.220                   |
| CELL_CYCLE_REGULATOR               | -1.519            | 0.044                   | 0.214                   |
| EMT_DOWN_JECHLINGER                | -1.519            | 0.036                   | 0.207                   |
| hcmvPathway                        | -1.511            | 0.029                   | 0.215                   |
| MOUSE_E2F1_UP                      | -1.506            | 0.056                   | 0.217                   |
| BREAST_CANCER_ESTROGEN_SIGNALLING  | -1.505            | 0.010                   | 0.212                   |
| EPITHELIAL_DOWN_ZUCCHI             | -1.503            | 0.022                   | 0.210                   |
| metPathway                         | -1.502            | 0.032                   | 0.205                   |
| JISON_STRESS                       | -1.502            | 0.021                   | 0.200                   |
| pdgfPathway                        | -1.496            | 0.028                   | 0.206                   |
| IFNB_HT1080_UP                     | -1.493            | 0.022                   | 0.205                   |
| Fatty acid metabolism              | -1.491            | 0.011                   | 0.202                   |
| p38mapkPathway                     | -1.487            | 0.051                   | 0.202                   |
| Apoptosis                          | -1.484            | 0.014                   | 0.202                   |
| rasPathway                         | -1.484            | 0.043                   | 0.198                   |
| MOUSE_DENA_UP                      | -1.484            | 0.098                   | 0.194                   |
| Fatty_Acid_Degradation             | -1.482            | 0.034                   | 0.192                   |
| MLL_FUSION_ROSS                    | -1.480            | 0.048                   | 0.190                   |
| MGUS_MM_DAVIES                     | -1.475            | 0.048                   | 0.194                   |
| Prostaglandin_synthesis_regulation | -1.461            | 0.057                   | 0.210                   |
| HYPOXIA_UP_MANALO                  | -1.450            | 0.013                   | 0.223                   |
| insulinPathway                     | -1.448            | 0.045                   | 0.221                   |
| MOUSE_MYC_TGFA_UP                  | -1.439            | 0.017                   | 0.231                   |
| TGF_Beta_Signaling_Pathway         | -1.436            | 0.074                   | 0.232                   |

| <u>NAME</u>                                      | <u>NES</u> | <u>NOM p-val</u> | <u>FDR q-val</u> |
|--------------------------------------------------|------------|------------------|------------------|
| P53_SIGNALLING                                   | -1.433     | 0.005            | 0.232            |
| hivnefPathway                                    | -1.431     | 0.029            | 0.231            |
| IFNG_HT1080_UP                                   | -1.429     | 0.048            | 0.231            |
| RAPAMYCIN_UP_PENG                                | -1.429     | 0.037            | 0.227            |
| SIG_BCR_SIGNALING_PATHWAY                        | -1.428     | 0.043            | 0.223            |
| TGF_BETA_SIGNALING_PATHWAY                       | -1.421     | 0.076            | 0.230            |
| TH_UP_KIM                                        | -1.421     | 0.069            | 0.227            |
| fcer1Pathway                                     | -1.417     | 0.019            | 0.229            |
| PROTEASOME_DEGRADATION                           | -1.414     | 0.124            | 0.230            |
| IFNA_HEPATO_UP                                   | -1.412     | 0.070            | 0.230            |
| Proteasome_Degradation                           | -1.409     | 0.137            | 0.231            |
| Smooth_muscle_contraction                        | -1.407     | 0.035            | 0.230            |
| egfPathway                                       | -1.407     | 0.078            | 0.226            |
| GO_ROS                                           | -1.406     | 0.075            | 0.224            |
| G_Protein_Signaling                              | -1.402     | 0.037            | 0.228            |
| mapkPathway                                      | -1.402     | 0.046            | 0.225            |
| cxcr4Pathway                                     | -1.400     | 0.063            | 0.224            |
| igf1Pathway                                      | -1.399     | 0.071            | 0.223            |
| HUMAN_CD34_ENRICHED_TF                           | -1.396     | 0.028            | 0.224            |
| SA_B_CELL_RECEPTOR_COMPLEXES                     | -1.395     | 0.083            | 0.222            |
| CELL_GROWTH_AND_OR_MAINTENANCE                   | -1.393     | 0.048            | 0.221            |
| PASSERINI_TRANSCRIPTION                          | -1.393     | 0.061            | 0.219            |
| CELL_SURFACE_RECEPTOR_LINKED_SIGNAL_TRANSDUCTION | -1.393     | 0.044            | 0.217            |
| tnfr1Pathway                                     | -1.391     | 0.090            | 0.216            |
| PASSERINI_ADHESION                               | -1.389     | 0.071            | 0.216            |
| TUMOR_SUPPRESSOR                                 | -1.389     | 0.071            | 0.213            |
| PASSERINI_INFLAMMATION                           | -1.388     | 0.112            | 0.213            |
| CBF_ROSS                                         | -1.374     | 0.040            | 0.229            |
| GOLDRATH_MEMORY                                  | -1.372     | 0.093            | 0.229            |
| OKUMURA_MC_LPS                                   | -1.372     | 0.023            | 0.226            |
| keratinocytePathway                              | -1.367     | 0.085            | 0.231            |
| ceramidePathway                                  | -1.366     | 0.081            | 0.229            |
| MOUSE_MYC_E2F1_UP                                | -1.360     | 0.101            | 0.236            |
| calcineurinPathway                               | -1.360     | 0.067            | 0.233            |
| vipPathway                                       | -1.357     | 0.057            | 0.234            |
| MOUSE_CIP_UP                                     | -1.356     | 0.053            | 0.233            |
| SIG_CHEMOTAXIS                                   | -1.353     | 0.107            | 0.236            |
| GNATENKO_PLATELET                                | -1.352     | 0.045            | 0.233            |
| tcPathway                                        | -1.352     | 0.063            | 0.231            |
| IFNG_5ENDOTHELIAL_UP                             | -1.348     | 0.107            | 0.234            |
| COPD_UP_NING                                     | -1.339     | 0.106            | 0.245            |
| gsk3Pathway                                      | -1.337     | 0.075            | 0.245            |
| IFNA_HT1080_UP                                   | -1.337     | 0.109            | 0.243            |
| TARTE_BCELL                                      | -1.337     | 0.090            | 0.241            |
| tpoPathway                                       | -1.337     | 0.120            | 0.239            |
| stressPathway                                    | -1.335     | 0.117            | 0.238            |
| ALMM_UP_ABRAHAM                                  | -1.334     | 0.155            | 0.237            |
| HADDAD_10VS7                                     | -1.329     | 0.011            | 0.242            |
| ZF_NEG_REG_OF_CELL_PROLIF                        | -1.325     | 0.035            | 0.245            |
| ngfPathway                                       | -1.324     | 0.101            | 0.244            |
| EMT_UP_JECHLINGER                                | -1.323     | 0.133            | 0.244            |

| <b><u>NAME</u></b>         | <b><u>NES</u></b> | <b><u>NOM p-val</u></b> | <b><u>FDR q-val</u></b> |
|----------------------------|-------------------|-------------------------|-------------------------|
| bcrPathway                 | -1.317            | 0.102                   | 0.250                   |
| FETAL_LIVER_HS_ENRICHED_TF | -1.316            | 0.060                   | 0.250                   |
| mcalpainPathway            | -1.315            | 0.103                   | 0.248                   |
