# Supplementary material
Source: PubMed Central journal article supplement (PMC3615553)
Supplement: NIHMS449134-supplement-Table_S2.pdf [file NIHMS449134-supplement-Table_S2.pdf]

**Supplementary Table 2**  
**Normalized Enrichment Scores from ASSESS for Lactation and Involution**

| NAME                                 | Ave Preg NES | Ave Inv NES | Lactation |      |      |       |      |      |       |      |      | Involution |       |       |       |       |       |       |       |       |       |       |       |       |
|--------------------------------------|--------------|-------------|-----------|------|------|-------|------|------|-------|------|------|------------|-------|-------|-------|-------|-------|-------|-------|-------|-------|-------|-------|-------|
|                                      |              |             | Day 1     |      |      | Day 3 |      |      | Day 7 |      |      | Day 1      |       |       | Day 2 |       |       | Day 3 |       |       | Day 4 |       |       |       |
|                                      |              |             | A         | B    | C    | A     | B    | C    | A     | B    | C    | A          | B     | C     | A     | B     | C     | A     | B     | C     | A     | B     | C     |       |
| GLUTAMINE_DOWN_PENG                  | 2.07         | -1.46       | 1.86      | 1.97 | 2.29 | 2.07  | 2.05 | 2.17 | 2.06  | 1.94 | 2.22 | 1.63       | -1.32 | -1.39 | -1.59 | -1.33 | -1.34 | -1.69 | -1.43 | -1.37 | -1.44 | -1.56 | -1.69 | -1.44 |
| ANDROGEN_UP_NELSON                   | 2.05         | -0.94       | 2.16      | 1.98 | 2.08 | 2.14  | 1.92 | 2.30 | 2.13  | 1.99 | 1.70 | -0.92      | -1.43 | -1.01 | -1.14 | -1.25 | -1.25 | -1.10 | -1.45 | -1.31 | -1.03 | -1.23 | -1.04 |       |
| LEUCINE_DOWN_PENG                    | 2.03         | -1.48       | 1.90      | 1.92 | 2.31 | 1.85  | 2.04 | 2.22 | 1.97  | 1.94 | 2.16 | -1.71      | -1.33 | -1.44 | -1.43 | -1.40 | -1.44 | -1.61 | -1.44 | -1.31 | -1.56 | -1.69 | -1.46 |       |
| MYC_P493_TET_UP                      | 2.01         | -1.47       | 1.84      | 1.88 | 2.07 | 2.26  | 1.97 | 2.16 | 2.09  | 1.94 | 1.89 | -1.15      | -1.53 | -1.50 | -1.95 | -1.36 | -1.35 | -1.73 | -1.40 | -1.42 | -1.05 | -1.49 | -1.71 |       |
| VOXPHOS                              | 1.99         | -1.54       | 2.10      | 2.01 | 1.96 | 2.00  | 2.08 | 2.10 | 1.68  | 1.85 | 2.16 | -1.20      | -2.05 | -1.44 | -1.38 | -1.65 | -1.66 | -1.43 | -1.52 | -1.93 | -1.65 | -1.02 | -1.57 |       |
| ELECTRON_TRANSPORT_CHAIN             | 1.99         | -1.53       | 2.08      | 2.07 | 1.96 | 2.09  | 1.97 | 2.00 | 1.66  | 1.93 | 2.13 | -1.31      | -1.58 | -1.60 | -1.33 | -1.71 | -1.54 | -1.27 | -1.63 | -1.86 | -1.53 | -1.38 | -1.56 |       |
| Electron_Transport_Chain             | 1.94         | -1.41       | 1.97      | 2.09 | 1.97 | 2.02  | 1.93 | 1.96 | 1.61  | 1.88 | 2.06 | -1.21      | -1.60 | -1.48 | -1.19 | -1.58 | -1.46 | -1.14 | -1.49 | -1.79 | -1.43 | -1.11 | -1.47 |       |
| ptdinsPathway                        | 1.94         | -0.25       | 2.30      | 1.79 | 2.11 | 1.99  | 1.97 | 2.19 | 1.93  | 2.11 | 1.09 | 0.99       | -0.89 | -0.88 | -1.10 | -1.26 | -1.59 | 1.14  | -1.17 | -1.28 | 0.96  | 1.05  | 1.01  |       |
| MYC_DATABASE_UP                      | 1.93         | -1.56       | 1.71      | 2.12 | 2.11 | 2.04  | 2.02 | 2.20 | 2.07  | 1.60 | 1.53 | -1.62      | -1.59 | -1.51 | -1.84 | -1.58 | -1.48 | -1.98 | -1.76 | -1.32 | -1.24 | -1.33 | -1.47 |       |
| RAPAMYCIN_DOWN_PENG                  | 1.92         | -1.29       | 1.68      | 1.93 | 2.18 | 1.96  | 1.79 | 2.12 | 1.89  | 1.82 | 1.90 | -1.18      | -1.22 | -1.11 | -1.58 | -1.41 | -1.43 | -1.23 | -1.34 | -1.24 | -1.29 | -1.32 | -1.17 |       |
| ANDROGEN_REGULATED_GENES             | 1.89         | -1.10       | 2.12      | 2.01 | 2.18 | 2.07  | 1.51 | 1.77 | 1.37  | 1.85 | 2.12 | -1.13      | -1.34 | -1.08 | -1.17 | -0.99 | -1.14 | -1.08 | -1.23 | -1.20 | -0.68 | -1.09 | -1.04 |       |
| Pyruvate metabolism                  | 1.87         | -1.48       | 1.79      | 1.87 | 1.95 | 2.14  | 1.97 | 1.70 | 1.73  | 1.84 | 1.83 | -1.55      | -1.62 | -1.54 | -1.43 | -1.65 | -1.63 | -1.46 | -1.21 | -1.40 | -1.08 | -1.70 | -1.48 |       |
| Butanoate metabolism                 | 1.86         | -1.06       | 1.86      | 1.74 | 1.97 | 1.98  | 1.89 | 1.81 | 2.09  | 1.64 | 1.77 | -1.85      | -1.41 | -1.16 | -1.04 | -1.28 | -1.42 | 1.33  | -1.02 | -1.33 | -0.91 | -1.50 | -1.07 |       |
| TARTE_PC                             | 1.86         | -1.35       | 1.85      | 2.02 | 2.04 | 1.68  | 1.85 | 2.09 | 1.82  | 1.75 | 1.62 | -1.23      | -1.54 | -2.07 | -0.88 | -1.36 | -1.59 | -1.41 | -1.09 | -1.40 | -1.03 | -1.40 | -1.18 |       |
| Glycolysis_and_Gluconeogenesis       | 1.83         | -1.45       | 1.92      | 1.78 | 1.97 | 2.12  | 1.61 | 1.64 | 1.87  | 1.74 | 1.80 | -1.47      | -1.36 | -1.39 | -1.54 | -1.71 | -1.62 | -1.25 | -1.45 | -1.67 | -1.20 | -1.62 | -1.18 |       |
| Glycolysis                           | 1.83         | -1.29       | 2.01      | 1.62 | 1.95 | 1.99  | 1.79 | 1.85 | 1.84  | 1.58 | 1.81 | -1.73      | -1.37 | -1.43 | -1.17 | -1.34 | -1.47 | -1.11 | -1.07 | -1.42 | -1.16 | -1.42 | -0.85 |       |
| Gluconeogenesis                      | 1.83         | -1.29       | 2.01      | 1.62 | 1.95 | 1.99  | 1.79 | 1.85 | 1.84  | 1.58 | 1.81 | -1.73      | -1.37 | -1.43 | -1.17 | -1.34 | -1.47 | -1.11 | -1.07 | -1.42 | -1.16 | -1.42 | -0.85 |       |
| MYELIN_DOWN_LE                       | 1.80         | 0.42        | 1.88      | 1.62 | 1.83 | 1.79  | 1.87 | 1.84 | 1.68  | 1.87 | 1.87 | 1.42       | -1.43 | -1.12 | 1.36  | 1.24  | -1.40 | 1.47  | 1.56  | -1.41 | 1.41  | -0.01 | 1.41  |       |
| Ribosomal_Proteins                   | 1.80         | -1.38       | 1.87      | 1.79 | 2.01 | 1.94  | 2.06 | 1.89 | 1.30  | 1.54 | 1.78 | -1.58      | -1.44 | -1.11 | -1.40 | -1.35 | -1.38 | -1.61 | -1.25 | -1.34 | -1.44 | -1.50 | -1.21 |       |
| Krebs_TCA_Cycle                      | 1.80         | -0.96       | 1.73      | 1.68 | 2.09 | 2.02  | 2.05 | 1.69 | 1.41  | 1.70 | 1.79 | -1.24      | -1.42 | -1.08 | -1.13 | -1.32 | -0.87 | 1.33  | -1.17 | -1.21 | -0.91 | -1.29 | -1.19 |       |
| KREBS_TCA_CYCLE                      | 1.79         | -1.04       | 1.68      | 1.71 | 2.05 | 1.84  | 2.04 | 1.64 | 1.41  | 1.94 | 1.81 | -1.43      | -1.35 | -1.16 | -1.23 | -1.41 | -1.01 | 1.06  | -1.05 | -1.33 | -0.90 | -1.21 | -1.43 |       |
| MITOCHONDRIA                         | 1.75         | -0.33       | 1.62      | 1.75 | 1.91 | 1.66  | 1.90 | 1.84 | 1.57  | 1.66 | 1.83 | -0.99      | -1.54 | -1.19 | -1.14 | -0.95 | -1.14 | 1.50  | 1.26  | -1.05 | 1.13  | -0.97 | 1.08  |       |
| HTERT_DOWN_SMITH                     | 1.74         | 0.20        | 1.73      | 1.49 | 1.87 | 1.70  | 1.64 | 1.71 | 1.54  | 1.98 | 1.98 | -1.40      | -1.59 | -1.17 | -0.72 | 1.06  | 1.32  | 1.15  | 1.35  | -1.14 | 1.04  | 1.27  | 1.15  |       |
| Oxidative phosphorylation            | 1.72         | -1.17       | 1.82      | 1.80 | 1.82 | 1.79  | 1.65 | 1.77 | 1.34  | 1.70 | 1.79 | -1.21      | -1.22 | -1.16 | -1.11 | -1.17 | -1.24 | -1.13 | -1.14 | -1.18 | -1.16 | -0.89 | -1.36 |       |
| TARTE_PLASMA_BLASTIC                 | 1.68         | -0.82       | 1.78      | 1.53 | 1.82 | 1.69  | 1.67 | 1.82 | 1.48  | 1.76 | 1.61 | -1.01      | -1.22 | -1.04 | -0.98 | -1.10 | -1.09 | -1.01 | -0.01 | -1.11 | -1.19 | 1.05  | -1.15 |       |
| SASAKI_TSLC1                         | 1.66         | 0.18        | 1.70      | 1.72 | 1.59 | 1.67  | 1.77 | 1.65 | 1.60  | 1.68 | 1.56 | -0.81      | -1.05 | -0.98 | -0.94 | 1.24  | -1.10 | -0.88 | 1.28  | 1.45  | 1.33  | 1.22  | 1.36  |       |
| GLUCOSE_UP_PENG                      | 1.63         | -1.00       | 1.90      | 1.48 | 1.63 | 1.78  | 1.59 | 1.77 | 1.71  | 1.29 | 1.49 | -1.58      | -0.89 | -1.71 | -1.11 | -0.95 | -1.05 | -1.08 | 0.82  | -1.13 | -1.31 | -0.98 | -1.08 |       |
| crebPathway                          | 1.59         | 1.13        | 2.14      | 1.76 | 1.31 | 2.38  | 1.34 | 1.82 | 1.09  | 1.32 | 1.13 | 1.01       | 1.17  | 1.41  | 1.32  | -0.83 | 1.09  | 1.64  | 1.48  | 1.50  | 1.55  | 0.97  | 1.28  |       |
| HUMAN_MITODB_6_2002                  | 1.58         | -0.55       | 0.00      | 1.81 | 1.87 | 1.69  | 1.91 | 1.80 | 1.60  | 1.65 | 1.88 | -0.92      | -1.61 | -1.18 | -1.05 | -1.05 | -1.15 | 1.37  | -1.05 | -1.15 | 1.13  | -1.05 | 1.04  |       |
| PANCREAS_CHR17_AGUIRRE               | 1.54         | -1.19       | 1.67      | 2.06 | 0.91 | 1.50  | 1.44 | 1.68 | 1.15  | 1.59 | 1.85 | -1.27      | -1.11 | -1.43 | -1.27 | -0.90 | -1.28 | -1.43 | -0.96 | -0.89 | -1.40 | -1.12 | -1.19 |       |
| PEL_UP_KLEIN                         | 1.53         | -0.45       | 1.46      | 1.41 | 1.65 | 1.49  | 1.80 | 1.31 | 1.17  | 1.95 | 1.49 | -0.94      | -1.22 | -1.13 | -1.04 | -0.93 | -0.84 | -0.77 | -0.76 | -1.20 | 1.31  | 0.78  | 1.28  |       |
| PGC                                  | 1.49         | 1.04        | 1.56      | 1.66 | 1.79 | 1.72  | 1.74 | 1.73 | 0.00  | 1.52 | 1.69 | 0.00       | 1.12  | 1.05  | 1.58  | 1.34  | -1.12 | 1.51  | 1.59  | 1.52  | 1.32  | 1.42  | 1.20  |       |
| IFNG_5ENDOTHELIAL_DOWN               | 1.47         | 0.04        | 1.42      | 1.24 | 1.56 | 1.60  | 1.71 | 1.57 | 1.55  | 1.23 | 1.37 | -1.06      | -1.30 | -1.01 | 1.19  | -0.82 | -1.00 | 1.28  | -1.06 | 1.00  | 1.13  | 0.99  | 1.13  |       |
| MRNA_SPLICING                        | 1.44         | -1.00       | 1.49      | 1.01 | 1.50 | 1.63  | 1.60 | 1.21 | 1.71  | 1.41 | 1.41 | -1.26      | -1.48 | -1.38 | -1.31 | -0.96 | -1.57 | -1.27 | -1.13 | -0.66 | 0.93  | -1.14 | -0.84 |       |
| ST_PHOSPHOINOSITIDE_3_KINASE_PATHWAY | 1.42         | -0.21       | 1.03      | 1.44 | 1.62 | 1.93  | 1.50 | 1.75 | 0.95  | 1.48 | 1.11 | -0.79      | -1.27 | -1.30 | -0.78 | -1.01 | -0.89 | 1.28  | 1.31  | 1.47  | -0.98 | -0.87 | 1.34  |       |
| chemicalPathway                      | 1.42         | 0.23        | 1.51      | 1.28 | 1.76 | 1.20  | 1.68 | 1.44 | 1.29  | 1.51 | 1.12 | 1.71       | -1.32 | 1.01  | -1.02 | -1.21 | 0.95  | -1.07 | 1.53  | 1.27  | -1.20 | 0.89  | 1.20  |       |
| Circadian_Exercise                   | 1.42         | 0.77        | 1.47      | 1.32 | 1.01 | 1.85  | 1.31 | 1.43 | 1.49  | 1.31 | 1.59 | -1.06      | 1.27  | 1.19  | 1.22  | 1.30  | -0.94 | 1.55  | 1.20  | -0.80 | 1.19  | 1.50  | 1.66  |       |
| UEDA_MOUSE_SCN                       | 1.42         | 1.41        | 1.47      | 1.74 | 1.31 | 1.36  | 1.39 | 1.57 | 1.00  | 1.30 | 1.59 | 1.85       | 1.55  | 1.55  | 1.59  | 1.38  | 1.81  | 1.59  | 2.03  | -0.85 | 1.37  | 1.56  | 1.54  |       |
| UEDA_MOUSE_LIVER                     | 1.40         | 1.50        | 1.24      | 1.38 | 1.65 | 1.39  | 1.48 | 1.47 | 1.17  | 1.25 | 1.58 | -1.09      | 1.72  | 1.69  | 1.36  | 1.78  | 1.86  | 1.71  | 2.14  | 1.91  | 1.55  | 1.71  | 1.66  |       |
| ANDROGEN_GENES                       | 1.39         | -0.88       | 1.53      | 1.28 | 1.54 | 1.19  | 1.42 | 1.52 | 1.70  | 1.01 | 1.30 | -0.96      | 0.63  | -0.83 | -0.87 | -1.04 | -1.17 | -1.00 | -0.81 | -1.15 | -1.04 | -1.23 | -1.12 |       |
| PANCREAS_CHR1_AGUIRRE                | 1.39         | -0.53       | 1.66      | 1.44 | 0.87 | 1.34  | 1.76 | 1.51 | 1.11  | 1.60 | 1.19 | 1.18       | -0.64 | 0.62  | -0.71 | -0.80 | -0.77 | -0.91 | -0.77 | -0.88 | -0.75 | -0.97 | -0.99 |       |

| NAME                                      | Ave Preg NES | Ave Inv NES | Lactation |       |       |       |       |       |       |       |       | Involution |       |       |       |       |       |       |       |       |       |       |       |
|-------------------------------------------|--------------|-------------|-----------|-------|-------|-------|-------|-------|-------|-------|-------|------------|-------|-------|-------|-------|-------|-------|-------|-------|-------|-------|-------|
|                                           |              |             | Day 1     |       |       | Day 3 |       |       | Day 7 |       |       | Day 1      |       |       | Day 2 |       |       | Day 3 |       |       | Day 4 |       |       |
|                                           |              |             | A         | B     | C     | A     | B     | C     | A     | B     | C     | A          | B     | C     | A     | B     | C     | A     | B     | C     | A     | B     | C     |
| Translation_Factors                       | 1.38         | -1.18       | 1.52      | 1.51  | 1.43  | 1.51  | 1.30  | 1.60  | 1.37  | 1.31  | 0.88  | -1.05      | -1.42 | -1.17 | -1.43 | -1.13 | -0.76 | -1.14 | -1.12 | -1.32 | -0.95 | -1.37 | -1.27 |
| Pyrimidine metabolism                     | 1.36         | -0.83       | 1.77      | 1.59  | 1.56  | 0.94  | 1.28  | 1.47  | 1.16  | 1.59  | 0.91  | -0.95      | -1.31 | -1.02 | -0.86 | -0.82 | -1.14 | -1.15 | -1.00 | -1.01 | -0.81 | 1.10  | -1.01 |
| Purine metabolism                         | 1.33         | -0.37       | 1.31      | 1.58  | 1.43  | 1.24  | 1.34  | 1.39  | 1.22  | 1.30  | 1.13  | -0.86      | -1.34 | -1.09 | 1.29  | -0.72 | -0.73 | -0.74 | -0.81 | -0.84 | 1.22  | -0.80 | 0.99  |
| Glycine, serine and threonine metabolism  | 1.32         | -0.15       | 1.70      | 1.11  | 1.77  | 1.38  | 1.70  | 1.84  | -0.70 | 1.63  | 1.45  | -0.93      | -1.35 | -1.34 | -1.05 | 0.97  | 1.11  | 1.06  | 1.46  | 1.21  | -1.03 | -1.04 | -0.82 |
| BRENTANI_DNA_MET_AND_MOD                  | 1.32         | -0.13       | 1.83      | 0.98  | 1.21  | 0.93  | 1.40  | 1.33  | 0.98  | 1.51  | 1.70  | 1.60       | 1.17  | -1.05 | -1.48 | -0.92 | 1.37  | 0.93  | -1.00 | -1.09 | -1.08 | 1.06  | -1.12 |
| gleevecPathway                            | 1.28         | 1.40        | 1.22      | 1.12  | 1.41  | 1.25  | 1.65  | 1.64  | 1.12  | 1.10  | 1.01  | 1.21       | 1.47  | 1.52  | 1.62  | 1.54  | 1.44  | 1.40  | 1.18  | 1.41  | 1.52  | 1.23  | 1.24  |
| MM_UP_MUNSHI                              | 1.26         | 0.13        | 0.97      | 1.50  | 1.45  | 1.07  | 1.16  | 1.45  | 1.04  | 1.61  | 1.11  | -0.81      | 1.00  | -1.24 | 1.18  | -1.20 | 1.22  | -0.95 | 1.17  | -0.69 | -0.65 | 1.51  | 1.01  |
| 2ME2_CHAUHAN                              | 1.25         | 0.77        | 1.46      | 1.33  | 1.06  | 1.21  | 1.25  | 1.22  | 1.44  | 1.33  | 0.92  | 1.07       | 1.08  | 1.01  | -0.87 | 1.08  | 1.13  | 1.40  | -0.75 | 1.00  | 0.84  | 1.29  | 0.92  |
| Galactose metabolism                      | 1.24         | -1.03       | 1.73      | 1.15  | 1.80  | 1.37  | 1.20  | 1.72  | 1.63  | 1.57  | -0.98 | -1.49      | -1.35 | -1.45 | -1.22 | -1.05 | -1.40 | -1.10 | -1.24 | -1.28 | 0.98  | -1.20 | -0.67 |
| eif4Pathway                               | 1.20         | 0.66        | 1.19      | 1.58  | 1.30  | 1.83  | 1.49  | 1.76  | 1.35  | 1.22  | -0.90 | -0.93      | 1.34  | 1.38  | 1.36  | -0.88 | 1.32  | 1.13  | -1.02 | 0.99  | 1.00  | 1.10  | 1.18  |
| UNDERHILL_PROLIFERATION                   | 1.19         | -1.03       | 1.80      | 1.04  | 1.53  | 1.25  | 1.46  | 1.58  | -0.90 | 1.50  | 1.45  | -1.29      | -1.10 | -1.05 | -1.15 | -0.71 | -0.80 | -1.04 | -0.98 | -0.93 | -0.80 | -1.16 | -1.41 |
| CRASH_AND_BURN_MUT_SHEPARD                | 1.17         | 1.46        | -0.01     | 1.63  | 1.35  | 1.22  | 1.30  | 1.34  | 1.16  | 1.21  | 1.34  | 1.15       | 1.08  | 1.24  | 1.29  | 1.76  | 1.45  | 1.61  | 1.46  | 1.69  | 1.67  | 1.55  | 1.57  |
| WNT_SIGNALING                             | 1.14         | 1.16        | 1.52      | 1.44  | 1.61  | -1.10 | 1.23  | 1.51  | 0.93  | 1.60  | 1.55  | 1.14       | 1.61  | 1.86  | 1.17  | -0.83 | 1.39  | 1.43  | 1.46  | 1.11  | 1.16  | 1.50  | 0.86  |
| BCELL_ASTIER                              | 1.10         | 1.09        | 1.16      | 1.61  | 0.97  | -0.72 | 1.75  | 1.41  | 1.22  | 1.31  | 1.22  | -0.97      | -0.86 | 1.54  | 1.60  | 1.82  | 1.48  | 1.71  | 1.51  | 1.79  | 1.13  | 1.16  | 1.18  |
| ST_INTERLEUKIN_4_PATHWAY                  | 1.10         | -0.25       | 0.99      | 1.07  | 1.42  | 1.71  | 1.15  | 1.80  | 1.15  | 1.25  | -0.61 | -0.77      | -1.01 | -1.20 | -0.64 | -0.90 | -0.83 | 0.98  | 1.10  | 1.31  | -1.03 | -0.91 | 0.95  |
| no1Pathway                                | 1.09         | 0.39        | 1.64      | 1.29  | 1.49  | 1.32  | 0.00  | 1.04  | 1.48  | 0.84  | 0.73  | 1.21       | -1.29 | -0.98 | -0.98 | 1.44  | 1.06  | 0.96  | 1.16  | -0.77 | 0.99  | 0.91  | 0.94  |
| PANCREAS_CHR12_AGUIRRE                    | 1.08         | 1.48        | 1.35      | 1.17  | 1.33  | 1.52  | 0.89  | -0.77 | 1.60  | 1.21  | 1.38  | 1.51       | 1.63  | 1.59  | 1.62  | 1.39  | 1.68  | 1.42  | 1.11  | 1.89  | 1.05  | 1.34  | 1.50  |
| MOUSE_MYC_TGFA_UP                         | 1.05         | 1.23        | 1.18      | 1.19  | 1.54  | 1.18  | 1.36  | 1.37  | 1.27  | 1.30  | -0.96 | 1.41       | 1.23  | 1.08  | 1.26  | 1.59  | -0.82 | 1.59  | 1.63  | 1.49  | 1.36  | 1.52  | 1.44  |
| ZF_POS_REG_OF_CELL_PROLIF                 | 1.04         | 0.05        | -0.74     | 1.61  | 1.42  | 0.96  | 1.37  | 1.23  | 1.11  | 1.09  | 1.32  | -0.82      | -0.80 | -0.94 | -0.91 | 0.87  | -0.97 | 1.08  | 1.00  | -0.71 | 1.07  | 0.89  | 0.83  |
| WNT_NCCIT_ALL_UP                          | 1.04         | -0.33       | 1.55      | 1.42  | 1.17  | 1.17  | -0.61 | 1.32  | 0.74  | 1.12  | 1.48  | -1.16      | -1.60 | -1.94 | -1.74 | -0.76 | -0.87 | -0.76 | 0.91  | 0.84  | 1.05  | 1.15  | 0.97  |
| LEUCINE_UP_PENG                           | 1.04         | 1.22        | 1.27      | 1.39  | -0.81 | 1.17  | 1.26  | 1.39  | 0.97  | 1.42  | 1.28  | 1.25       | -0.94 | 1.04  | 1.62  | 1.79  | 1.24  | 1.61  | 1.66  | 1.21  | 1.53  | 1.28  | 1.31  |
| HCV_HCC_MARKER                            | 1.03         | 0.11        | 1.32      | -0.89 | 0.81  | 1.44  | 1.05  | 1.46  | 1.40  | 1.45  | 1.26  | 0.76       | -0.88 | -1.35 | -0.88 | 1.06  | 1.27  | 0.59  | 1.01  | -0.72 | -0.99 | 1.59  | 1.05  |
| mtorPathway                               | 1.03         | -0.57       | -0.57     | 1.59  | 1.38  | 1.79  | 1.24  | 1.89  | 1.42  | 1.44  | -0.94 | 0.94       | -0.84 | -0.67 | -0.73 | -0.94 | 1.08  | -0.80 | -0.85 | -1.06 | -0.88 | -1.23 | -0.88 |
| Phosphatidylinositol signaling system     | 1.02         | 0.67        | 1.03      | 1.40  | -0.81 | 1.37  | 1.60  | 1.42  | 1.03  | 1.02  | 1.10  | 1.57       | 1.13  | 0.76  | -1.13 | -0.84 | 1.28  | 1.23  | 1.50  | 1.41  | -0.80 | 0.91  | 0.97  |
| MOUSE_MYC_E2F1_DOWN                       | 1.02         | 0.21        | 1.22      | 1.40  | 1.40  | 1.39  | 1.32  | 1.32  | 1.07  | -0.96 | 0.97  | -1.13      | -1.25 | -1.17 | 1.19  | 1.54  | -0.89 | 1.13  | 1.19  | -0.87 | 0.84  | 0.86  | 1.13  |
| PANCREAS_CHR22_AGUIRRE                    | 1.01         | 0.40        | 0.87      | 1.25  | 0.91  | 1.07  | 1.59  | 1.18  | -0.77 | 1.26  | 1.71  | -1.03      | -1.59 | -1.15 | 1.53  | 1.28  | 1.27  | -1.30 | 1.54  | 1.08  | 1.18  | 0.94  | 1.08  |
| INSULIN_SIGNALLING                        | 1.01         | 1.03        | 1.27      | 1.05  | 1.12  | 1.53  | 1.29  | 1.48  | -1.04 | 1.30  | 1.06  | 1.16       | -1.22 | 1.12  | 1.18  | 1.28  | 1.44  | 1.30  | 1.35  | 1.37  | 1.06  | 1.18  | 1.13  |
| HISTONE_UP_PEART                          | 1.00         | -0.05       | 1.33      | 0.71  | 1.04  | 1.49  | 1.30  | 1.67  | -0.73 | 1.04  | 1.14  | -0.81      | 1.05  | -0.86 | -1.04 | 1.06  | -0.88 | 1.08  | -1.03 | -0.66 | -0.81 | 1.28  | 1.08  |
| Tryptophan metabolism                     | 0.99         | -0.15       | 1.13      | 0.90  | -0.70 | 0.99  | 1.60  | 1.23  | 1.17  | 1.15  | 1.42  | -1.25      | -1.06 | -1.40 | -0.70 | 1.11  | -1.32 | 1.27  | -0.73 | -1.05 | 1.07  | 0.88  | 1.42  |
| EPITHELIAL_UP_ZUCCHI                      | 0.99         | 1.25        | 1.23      | 0.82  | 1.26  | 1.09  | 1.33  | 1.25  | -0.81 | 1.25  | 1.45  | 1.38       | 1.65  | 1.27  | 1.49  | 1.42  | -0.64 | 1.35  | 1.76  | 1.70  | 1.58  | 1.00  | 1.10  |
| MOUSE_MYC_TGFA_DOWN                       | 0.98         | 0.54        | 1.20      | 1.23  | 1.24  | 1.37  | 1.33  | 1.27  | 1.07  | -0.82 | 0.96  | -1.09      | -0.99 | -0.94 | 1.52  | 1.73  | 1.13  | 1.31  | 1.29  | 1.20  | 1.23  | -1.09 | 1.23  |
| ST_MYOCYTE_AD_PATHWAY                     | 0.97         | 0.55        | 0.91      | 1.41  | 1.23  | 1.21  | 1.46  | 1.12  | 1.14  | 1.01  | -0.78 | 1.13       | 1.15  | 1.51  | -0.92 | -0.73 | -0.85 | 1.11  | 1.13  | -0.67 | 1.15  | 1.36  | 1.18  |
| sppaPathway                               | 0.97         | 0.36        | 1.30      | 0.93  | 1.22  | 1.43  | 1.08  | 0.81  | 1.37  | -0.80 | 1.37  | 0.55       | 1.42  | 1.19  | -0.81 | -1.06 | 1.14  | 0.95  | -0.87 | -0.76 | 0.89  | 0.65  | 1.02  |
| BRENTANI_DEATH                            | 0.95         | 0.92        | 0.94      | 1.25  | 1.21  | 0.94  | 1.41  | 1.13  | -0.83 | 1.26  | 1.25  | 1.40       | 1.03  | 1.29  | -0.93 | -0.64 | 1.19  | 0.87  | 1.50  | 1.48  | 1.32  | 1.48  | 1.06  |
| SIG_IL4RECEPTOR_IN_B_LYPHOCYTES           | 0.95         | 1.11        | 1.20      | 1.15  | 0.88  | 1.74  | 1.22  | 1.32  | 0.90  | 1.03  | -0.90 | 1.29       | 1.48  | 1.01  | 1.26  | 1.28  | 1.51  | 1.19  | 1.31  | 1.34  | 1.09  | -0.64 | 1.13  |
| amiPathway                                | 0.95         | 0.57        | 1.65      | 1.05  | 1.37  | 1.26  | 0.79  | 0.96  | -0.78 | 1.05  | 1.19  | 1.10       | -1.14 | -0.92 | 1.67  | 1.38  | -0.70 | 1.92  | 1.25  | -0.78 | 1.15  | 0.63  | 1.28  |
| cskPathway                                | 0.95         | 0.57        | 1.65      | 1.05  | 1.37  | 1.26  | 0.79  | 0.96  | -0.78 | 1.05  | 1.19  | 1.10       | -1.14 | -0.92 | 1.67  | 1.38  | -0.70 | 1.92  | 1.25  | -0.78 | 1.15  | 0.63  | 1.28  |
| ELECTRON_TRANSPORTER_ACTIVITY             | 0.95         | 0.34        | -0.01     | -0.64 | 1.48  | 0.98  | 1.58  | 1.47  | 1.11  | 1.27  | 1.27  | -1.00      | -0.85 | -1.27 | 1.27  | 1.28  | -0.83 | 1.44  | 1.21  | -0.78 | 1.10  | 1.10  | 1.34  |
| IL5_DOWN_BYSTROM                          | 0.94         | 1.06        | 1.26      | 1.12  | 1.17  | 0.99  | 1.22  | 1.17  | 1.00  | 1.28  | -0.73 | 1.17       | -0.85 | 0.98  | 1.89  | 1.65  | 1.55  | 1.18  | 1.58  | -0.86 | 1.44  | 1.66  | 1.28  |
| DNA_replication_Reactome                  | 0.94         | -0.99       | 1.50      | 1.14  | 1.47  | 1.20  | 1.08  | 1.67  | -0.55 | 1.56  | -0.66 | -0.76      | -0.81 | -1.09 | -0.77 | -1.01 | -1.08 | -0.92 | -0.94 | -0.68 | -1.11 | -1.58 | -1.19 |
| nos1Pathway                               | 0.92         | 0.56        | 1.47      | 1.46  | 1.21  | -0.81 | -0.22 | 1.15  | 1.31  | 1.09  | 1.64  | 1.06       | -1.09 | -0.92 | 0.89  | 1.21  | -0.69 | 1.05  | 1.33  | 1.09  | 1.18  | 0.70  | 0.89  |
| AML1_ETO_ROSS                             | 0.90         | 1.05        | -0.98     | 1.43  | 1.41  | 1.54  | 1.53  | 1.34  | -0.98 | 1.13  | 1.65  | -1.05      | 1.20  | -0.85 | 1.21  | 1.53  | 1.73  | 1.77  | 1.49  | 1.79  | 1.27  | 1.25  | 1.30  |
| Urea cycle and metabolism of amino groups | 0.90         | 0.55        | -0.79     | 1.28  | 0.71  | 1.22  | 0.86  | 0.92  | 1.19  | 1.18  | 1.49  | -0.52      | -1.26 | 0.78  | 1.05  | 1.48  | -0.51 | 1.43  | 2.09  | 1.40  | 0.84  | -1.20 | 1.03  |
| MARSHALL_SPLEEN_BAL                       | 0.89         | 0.61        | 1.46      | -0.71 | -0.92 | 0.99  | 1.11  | 1.60  | 1.18  | 1.72  | 1.59  | 1.07       | -0.91 | 0.79  | -0.88 | -0.83 | 0.96  | 1.44  | 0.93  | 0.96  | 1.39  | 1.11  | 1.29  |
| Glycerolipid metabolism                   | 0.89         | -0.47       | -0.96     | 1.03  | 1.50  | 1.03  | 1.48  | 1.17  | 0.80  | 1.14  | 0.84  | -1.09      | -1.24 | -1.25 | -0.83 | -0.74 | -1.04 | 0.93  | -0.71 | -1.18 | 1.26  | -0.80 | 1.03  |

| NAME                                       | Ave Preg NES | Ave Inv NES | Lactation |       |       |       |       |       |       |       |       | Involution |       |       |       |       |       |       |       |       |       |       |       |
|--------------------------------------------|--------------|-------------|-----------|-------|-------|-------|-------|-------|-------|-------|-------|------------|-------|-------|-------|-------|-------|-------|-------|-------|-------|-------|-------|
|                                            |              |             | Day 1     |       |       | Day 3 |       |       | Day 7 |       |       | Day 1      |       |       | Day 2 |       |       | Day 3 |       |       | Day 4 |       |       |
|                                            |              |             | A         | B     | C     | A     | B     | C     | A     | B     | C     | A          | B     | C     | A     | B     | C     | A     | B     | C     | A     | B     | C     |
| erk5Pathway                                | 0.89         | 1.17        | 1.10      | 1.27  | 0.95  | 2.32  | 1.33  | 1.38  | -0.75 | 1.11  | -0.71 | 1.78       | 1.69  | 1.28  | 1.47  | -0.80 | 1.24  | 1.62  | 1.60  | 1.22  | 0.87  | 0.75  | 1.30  |
| Wnt_signaling                              | 0.88         | 1.15        | 1.58      | 1.39  | 1.16  | -0.93 | 1.02  | 1.39  | -0.81 | 1.56  | 1.53  | 1.18       | 1.54  | 2.07  | 1.09  | -0.87 | 1.44  | 1.37  | 1.41  | 1.11  | 1.23  | 1.39  | 0.91  |
| BCL2_FAMILY_AND_REG_NETWORK                | 0.87         | 1.02        | 1.44      | 1.27  | 0.93  | 1.22  | 1.21  | -0.75 | 0.85  | 0.91  | 0.71  | 1.86       | -0.79 | 0.93  | 1.14  | 1.71  | 1.47  | 0.85  | 1.53  | 1.76  | -0.80 | 1.14  | 1.42  |
| Prostaglandin and leukotriene metabolism   | 0.85         | 0.45        | 1.18      | 1.09  | 1.27  | 1.28  | 1.49  | -0.90 | -0.66 | 1.57  | 1.36  | 1.30       | 0.60  | 0.79  | -1.14 | 0.88  | -0.70 | 1.39  | -0.82 | 1.14  | 1.42  | 1.55  | -0.96 |
| Propanoate metabolism                      | 0.79         | 1.12        | -0.79     | -0.80 | 1.38  | 0.98  | 1.38  | 1.09  | 1.12  | 1.45  | 1.27  | 1.67       | -0.89 | -0.82 | 1.62  | 1.08  | 1.57  | 1.77  | 1.77  | 1.49  | 1.46  | 1.15  | 1.52  |
| PANCREAS_CHR8_AGUIRRE                      | 0.77         | 1.08        | -0.94     | 1.21  | 1.34  | 1.13  | 1.51  | 1.41  | -1.03 | 1.14  | 1.15  | -1.36      | 1.42  | 1.15  | 1.42  | 2.07  | 1.53  | 1.53  | 1.66  | 1.67  | -0.76 | 1.52  | 1.11  |
| WNT_SW480_UP                               | 0.77         | 0.83        | 1.29      | 1.10  | -0.89 | 1.15  | 1.25  | 1.18  | -0.75 | 1.08  | 1.50  | 1.35       | -1.14 | -0.95 | 1.35  | 1.77  | 1.38  | 1.44  | 1.47  | 1.45  | -0.97 | 1.31  | 1.48  |
| CBF_LEUKEMIA_ROSS                          | 0.77         | 0.74        | -0.86     | 1.11  | 1.39  | 1.39  | 1.20  | -0.84 | 1.09  | 1.05  | 1.37  | -0.81      | 1.09  | -1.01 | 1.00  | 1.61  | 1.24  | 1.53  | -0.71 | 1.23  | 1.35  | 1.12  | 1.28  |
| WNT_MOUSEHC11_DOWN                         | 0.73         | 0.43        | -0.70     | 1.07  | -1.18 | 0.97  | 1.10  | 1.15  | 1.44  | 1.38  | 1.36  | -1.16      | -0.80 | -0.85 | 1.07  | 0.94  | -0.77 | 1.05  | 1.17  | 0.91  | 1.42  | 1.15  | 1.06  |
| SIG_PIP3SIGINCARDIACMYOCTES                | 0.73         | 0.86        | -0.83     | 1.13  | 1.03  | 1.55  | 1.15  | 1.35  | -0.88 | 1.11  | 0.94  | 1.16       | -0.84 | -0.91 | 1.35  | -0.71 | 1.52  | 1.25  | 1.68  | 1.57  | 1.71  | 1.03  | 1.49  |
| ghPathway                                  | 0.72         | 1.09        | -0.70     | 0.89  | 0.80  | 1.20  | 1.49  | 1.62  | 0.76  | -0.77 | 1.21  | -0.73      | 1.56  | 1.37  | 1.79  | 1.15  | 1.06  | 1.07  | 1.23  | 1.11  | 1.18  | 1.15  | 1.14  |
| erkPathway                                 | 0.72         | 1.34        | 1.28      | 1.19  | -0.91 | 0.97  | 1.17  | 1.54  | -1.04 | 1.02  | 1.24  | 1.24       | 1.56  | 2.01  | 1.67  | 1.95  | 1.03  | 1.99  | 1.27  | 1.14  | 1.48  | -0.87 | 1.56  |
| WNT_DB                                     | 0.70         | 0.20        | 1.22      | 1.27  | 1.43  | -0.89 | 1.20  | 1.00  | -0.53 | 0.94  | 0.68  | -0.91      | -1.20 | 0.75  | -1.08 | 1.29  | 1.53  | 0.66  | 0.96  | -0.69 | 0.91  | -0.63 | 0.85  |
| INSULIN_2F_UP_ROME                         | 0.67         | 1.26        | 1.18      | 1.06  | 1.16  | 1.06  | 1.29  | 1.26  | -1.23 | -0.88 | 1.10  | 1.21       | 1.24  | -0.03 | 1.48  | 1.42  | 1.45  | 1.25  | 1.74  | 1.34  | 0.99  | 1.54  | 1.48  |
| ESC_UP_BHATTACHARYA                        | 0.67         | -0.38       | 0.80      | 1.19  | -0.70 | 1.39  | 0.74  | 0.91  | -0.78 | 1.00  | 1.46  | -0.91      | -1.47 | -0.25 | -0.97 | -0.63 | -0.80 | -1.07 | 0.93  | -0.77 | 1.07  | -0.65 | 1.01  |
| ST_GA13_PATHWAY                            | 0.66         | 1.09        | -0.58     | 1.00  | 1.06  | 1.29  | 1.01  | 1.14  | 1.04  | 1.20  | -1.18 | 1.51       | 1.27  | 0.89  | 1.20  | 1.11  | 1.51  | 1.18  | 1.33  | 1.38  | -0.72 | 1.16  | 1.24  |
| GOLDRATH_HP                                | 0.66         | 1.53        | -1.12     | 1.06  | -1.04 | 0.94  | 1.08  | 1.27  | 1.33  | 1.22  | 1.14  | 1.82       | 1.61  | 0.00  | 1.82  | 1.72  | 1.96  | 1.61  | 1.95  | 1.60  | 1.55  | 1.45  | 1.31  |
| HYPOXIA_DOWN_MANALO                        | 0.64         | 1.09        | 1.20      | 1.11  | 1.27  | 1.18  | 1.02  | 0.89  | -1.04 | 1.06  | -0.89 | 0.95       | 1.48  | 1.27  | 1.72  | 1.20  | 1.45  | 1.07  | 0.94  | 1.23  | -0.60 | 1.14  | 1.25  |
| CBF_ROSS                                   | 0.64         | 1.58        | -1.01     | 0.93  | 1.19  | 1.14  | 1.13  | -0.94 | 1.04  | 0.97  | 1.30  | 1.38       | 1.35  | 1.36  | 1.48  | 1.89  | 1.86  | 1.85  | 1.66  | 1.83  | 1.51  | 1.57  | 1.25  |
| E2F1_CHIP                                  | 0.63         | 1.25        | 1.07      | 1.00  | 0.91  | 0.88  | -0.76 | 1.07  | -0.86 | 1.34  | 1.04  | 1.24       | 1.60  | 1.36  | 1.58  | 1.75  | 1.55  | 1.26  | -0.75 | 1.57  | 1.19  | 1.34  | 1.34  |
| mitochondriaPathway                        | 0.62         | 1.21        | -0.95     | 0.99  | 1.44  | -1.13 | 1.14  | 0.97  | 0.96  | 1.16  | 0.98  | 1.45       | 0.73  | 1.29  | 0.59  | 1.55  | 1.28  | 0.64  | 1.43  | 1.63  | 0.92  | 1.50  | 1.57  |
| ST_DIFFERENTIATION_PATHWAY_IN_PC12_CELLS   | 0.62         | 1.20        | 0.86      | 0.97  | 0.92  | 1.15  | 1.04  | 1.25  | -0.76 | 0.84  | -0.72 | 1.01       | 1.38  | 0.91  | 0.96  | 1.13  | 1.35  | 1.07  | 1.53  | 1.34  | 1.31  | 0.97  | 1.48  |
| GLUCOSE_DOWN_PENG                          | 0.61         | 1.59        | -0.81     | 1.11  | 1.10  | 1.28  | -0.01 | 1.12  | -0.86 | 1.43  | 1.10  | 1.18       | 1.46  | 1.65  | 1.56  | 1.97  | 1.65  | 1.87  | 1.40  | 1.80  | 1.60  | 1.47  | 1.50  |
| ELECTRON_TRANSPORT                         | 0.60         | 1.40        | -0.01     | 1.38  | -1.19 | 1.26  | 1.23  | 1.32  | -1.14 | 1.20  | 1.34  | 1.34       | 1.13  | 0.95  | 1.39  | 1.85  | 1.50  | 1.33  | 1.62  | 1.66  | 1.45  | 1.37  | 1.23  |
| MYC_5CELLS_CHIP                            | 0.60         | 1.58        | 1.32      | 1.33  | 1.57  | -1.05 | 1.40  | 1.34  | -0.81 | 1.21  | -0.91 | 1.21       | 1.47  | 1.14  | 1.72  | 1.72  | 1.75  | 1.54  | 1.71  | 1.79  | 1.63  | 1.48  | 1.77  |
| S1P_Signaling                              | 0.60         | 1.14        | 1.18      | 0.90  | 0.87  | 1.01  | 0.92  | 1.11  | 1.33  | -0.84 | -1.10 | 1.34       | 1.17  | -0.80 | 1.72  | 1.07  | 1.38  | 1.39  | 1.56  | 1.46  | 1.12  | 0.77  | 1.48  |
| COPD_UP_NING                               | 0.59         | 1.58        | 1.10      | 1.16  | 1.18  | -0.93 | -0.05 | 1.31  | -1.05 | 1.13  | 1.46  | 1.20       | 1.51  | 1.21  | 1.56  | 1.95  | 1.39  | 1.73  | 2.08  | 1.81  | 1.65  | 1.28  | 1.59  |
| tob1Pathway                                | 0.56         | 0.99        | 1.16      | -0.77 | -1.02 | 1.22  | 0.83  | 1.05  | 0.98  | 0.90  | 0.72  | 0.69       | 1.13  | 1.10  | 1.72  | 0.95  | 0.81  | 1.36  | -0.69 | 0.91  | 1.53  | 1.32  | 1.01  |
| BRENTANI_REPAIR                            | 0.56         | 1.17        | 0.98      | 1.03  | -0.90 | 0.90  | -0.90 | 1.09  | 0.92  | 1.05  | 0.85  | 1.18       | 1.38  | 1.16  | 1.49  | 1.39  | 1.43  | -0.63 | 1.67  | 1.77  | 0.77  | 1.33  | 1.13  |
| il2Pathway                                 | 0.55         | 0.67        | -0.83     | 0.73  | 1.01  | -1.11 | 1.38  | 1.00  | 1.01  | 0.65  | 1.15  | -0.91      | 0.94  | 1.49  | -0.64 | 1.27  | 0.91  | 1.20  | -0.79 | 1.51  | 1.30  | 0.89  | 0.89  |
| LU_IL4CELL                                 | 0.54         | 0.36        | -0.80     | 1.50  | 1.26  | -0.83 | 1.06  | 1.53  | 0.84  | -0.89 | 1.21  | 1.27       | -0.83 | 1.01  | -0.68 | -0.64 | -0.93 | 1.32  | 1.38  | 1.12  | 1.23  | -1.09 | 1.12  |
| HTERT_UP_SMITH                             | 0.53         | 1.59        | 1.27      | 1.17  | -1.07 | 1.17  | 1.16  | 1.22  | -0.88 | 1.48  | -0.72 | 1.35       | 1.35  | 1.41  | 1.57  | 1.65  | 1.59  | 1.82  | 2.20  | 1.65  | 1.49  | 1.52  | 1.44  |
| nktPathway                                 | 0.53         | 1.38        | -0.85     | 0.96  | 0.70  | 0.76  | 0.95  | -0.79 | 0.95  | 1.23  | 0.86  | 1.44       | 1.03  | 1.07  | 1.70  | 1.56  | 1.19  | 1.67  | 1.43  | 1.06  | 1.69  | 1.22  | 1.53  |
| caspasePathway                             | 0.53         | -0.01       | -1.11     | 1.29  | 1.46  | -0.78 | 1.09  | 0.77  | 1.44  | 1.42  | -0.83 | -1.26      | -0.90 | -0.88 | -0.92 | -1.00 | 1.00  | 0.87  | 0.87  | -0.83 | 1.07  | 1.18  | 0.72  |
| Arginine and proline metabolism            | 0.53         | 0.74        | -0.85     | -0.70 | 0.81  | 0.69  | 1.11  | 0.80  | 0.95  | 1.01  | 0.92  | -0.81      | -1.29 | -0.93 | 1.15  | 1.68  | 1.06  | 1.63  | 1.87  | 1.63  | 1.79  | 0.89  | 1.24  |
| hdacPathway                                | 0.52         | 1.11        | 0.87      | 0.91  | 0.89  | 1.46  | 0.00  | 1.20  | 0.95  | -0.82 | -0.77 | 1.48       | 1.28  | 1.18  | 1.30  | 0.77  | 1.80  | 1.37  | 1.42  | -0.67 | 0.93  | 1.18  | 1.33  |
| Glycogen_Metabolism                        | 0.51         | 0.51        | 1.43      | 1.06  | 1.10  | -1.15 | -0.14 | 1.11  | 1.15  | -0.98 | 1.05  | -1.96      | 1.37  | 1.17  | 1.00  | 1.20  | 0.85  | 1.14  | 0.88  | -0.85 | -1.11 | 1.27  | 1.11  |
| nfatPathway                                | 0.47         | 1.25        | 0.95      | 1.17  | 0.96  | 1.27  | 0.00  | 0.93  | -0.85 | 0.85  | -1.02 | 1.12       | 1.13  | 1.29  | 1.11  | 1.16  | 1.86  | 1.07  | 1.37  | 1.58  | 1.09  | 1.03  | 1.24  |
| Valine, leucine and isoleucine degradation | 0.47         | 1.51        | -0.81     | -0.77 | 1.25  | -1.41 | 1.28  | 1.00  | 1.30  | 1.18  | 1.18  | 1.57       | 1.21  | 1.18  | 1.83  | 1.24  | 1.89  | 1.77  | 1.59  | 1.31  | 1.74  | 1.08  | 1.73  |
| BRCA_UP_WELCSH                             | 0.44         | 0.97        | 1.24      | 1.10  | 1.26  | 1.37  | -1.24 | -0.98 | 1.13  | 0.91  | -0.81 | -0.95      | 1.12  | 1.28  | 1.07  | 1.78  | -1.02 | 1.37  | 1.55  | 1.28  | 1.64  | 1.24  | 1.23  |
| PASSERINI_GROWTH                           | 0.42         | 0.77        | 1.16      | 0.94  | -0.57 | 0.62  | -0.69 | 0.91  | -0.76 | 0.87  | 1.27  | -0.79      | 0.99  | -0.77 | 1.19  | 1.31  | -0.65 | 1.81  | 1.52  | 1.14  | 1.07  | 0.87  | 1.57  |
| edg1Pathway                                | 0.40         | 1.44        | 1.28      | -0.72 | 0.78  | 0.78  | 1.19  | 0.88  | -0.83 | -0.73 | 0.95  | 1.96       | 1.59  | 1.51  | 1.60  | 1.19  | 1.04  | 1.43  | 1.57  | 1.28  | 1.67  | 1.04  | 1.40  |
| BRENTANI_CELL_CYCLE                        | 0.40         | 1.41        | 1.04      | 0.97  | 0.91  | 1.05  | -0.91 | 1.17  | -0.90 | -0.79 | 1.01  | 1.16       | 1.41  | 1.43  | 1.17  | 1.47  | 1.30  | 1.60  | 1.29  | 1.16  | 1.67  | 1.67  | 1.64  |
| ST_ADRENERGIC                              | 0.37         | 1.34        | -0.67     | 1.14  | 1.05  | 1.40  | 1.47  | 1.22  | -0.74 | -0.72 | -0.83 | 1.64       | 1.41  | 1.60  | 1.26  | 0.85  | 1.38  | 1.37  | 1.44  | 1.31  | 1.32  | 1.18  | 1.38  |
| FETAL_LIVER_HS_ENRICHED_TF                 | 0.36         | 1.59        | -0.89     | 0.85  | -1.01 | -0.83 | 0.98  | 0.98  | 1.15  | 0.79  | 1.20  | 1.29       | 0.95  | 1.44  | 1.59  | 1.99  | 1.65  | 1.56  | 2.01  | 1.70  | 1.81  | 1.49  | 1.56  |

| NAME                                  | Ave Preg NES | Ave Inv NES | Lactation |       |       |       |       |       |       |       |       | Involution |       |       |       |       |       |       |       |       |       |       |      |
|---------------------------------------|--------------|-------------|-----------|-------|-------|-------|-------|-------|-------|-------|-------|------------|-------|-------|-------|-------|-------|-------|-------|-------|-------|-------|------|
|                                       |              |             | Day 1     |       |       | Day 3 |       |       | Day 7 |       |       | Day 1      |       |       | Day 2 |       |       | Day 3 |       |       | Day 4 |       |      |
|                                       |              |             | A         | B     | C     | A     | B     | C     | A     | B     | C     | A          | B     | C     | A     | B     | C     | A     | B     | C     | A     | B     | C    |
| HISTONE_DOWN_PEART                    | 0.34         | 1.52        | 0.85      | 0.93  | 1.00  | -1.26 | 0.99  | 0.95  | -0.80 | -0.65 | 1.06  | 0.94       | 1.48  | 1.19  | 2.15  | 1.50  | 1.71  | 1.83  | 1.84  | 1.44  | 1.24  | 1.44  | 1.47 |
| MOUSE_E2F1_DOWN                       | 0.29         | 0.77        | -0.84     | 0.93  | 1.40  | 1.06  | 1.31  | 1.21  | -0.88 | -0.80 | -0.80 | -1.02      | 0.73  | -1.04 | 1.65  | 1.74  | 1.38  | 1.48  | 1.37  | -0.73 | 1.08  | 1.16  | 1.39 |
| gpcrPathway                           | 0.29         | 1.21        | 1.06      | 1.10  | 0.99  | 0.91  | -0.05 | -0.70 | -0.82 | -0.75 | 0.83  | 0.98       | 0.87  | 1.53  | 0.90  | 1.61  | 1.07  | 1.42  | 1.12  | 1.67  | 1.30  | 0.89  | 1.17 |
| PASSERINI_PROLIFERATION               | 0.26         | 0.46        | -0.73     | 0.92  | -0.91 | -0.77 | 1.03  | 1.17  | -0.87 | 1.20  | 1.34  | 1.18       | -0.62 | -0.63 | -0.87 | 1.20  | 0.80  | 1.54  | -0.52 | -0.55 | 1.45  | 1.22  | 1.34 |
| epoPathway                            | 0.26         | 0.79        | -1.06     | -0.82 | 1.05  | -1.19 | 1.53  | 1.19  | 1.25  | -0.85 | 1.28  | -0.91      | 1.21  | 1.95  | -0.61 | 1.31  | 0.96  | 1.39  | -0.90 | 1.56  | 1.36  | 1.16  | 1.00 |
| INS_RECEPT_PATH_IN_CARDIACMYOCYTES    | 0.26         | 1.63        | -0.95     | 1.02  | 1.05  | 1.86  | 1.25  | 1.27  | -1.30 | -1.10 | -0.74 | 1.71       | 1.29  | 1.47  | 1.75  | 1.48  | 1.62  | 1.82  | 1.69  | 1.68  | 1.88  | 1.38  | 1.76 |
| GLUTAMINE_UP_PENG                     | 0.24         | 1.48        | -1.01     | -0.88 | -0.96 | -0.91 | 1.33  | 1.07  | 1.30  | 1.15  | 1.08  | 1.32       | 1.33  | 1.15  | 1.55  | 1.64  | 1.52  | 1.52  | 1.64  | 1.61  | 1.46  | 1.53  | 1.45 |
| LOTEM_LEUKEMIA                        | 0.21         | 1.24        | -1.02     | -0.74 | 1.58  | -0.77 | 1.13  | 1.01  | -1.41 | 1.15  | 0.98  | 0.94       | 1.22  | 1.32  | 1.19  | 1.53  | 1.04  | 1.44  | 1.26  | 1.01  | 1.38  | 1.21  | 1.34 |
| ER_UP_FRASOR                          | 0.19         | 0.39        | -0.94     | -0.78 | 0.87  | 0.93  | 0.95  | -0.79 | 1.17  | 1.17  | -0.88 | 0.91       | -1.16 | -0.86 | -0.70 | 1.27  | -0.55 | 1.69  | 1.12  | 1.65  | 1.15  | -1.08 | 1.21 |
| integrinPathway                       | 0.16         | 0.72        | -0.78     | -0.84 | 0.76  | -0.68 | 0.95  | 1.08  | -0.85 | 0.73  | 1.02  | 1.02       | 1.25  | 1.42  | -0.69 | -1.21 | 1.03  | 1.64  | 1.22  | 1.06  | 1.61  | -0.72 | 1.04 |
| gsk3Pathway                           | 0.15         | 1.83        | 1.17      | -0.98 | -1.22 | -1.10 | -1.41 | 1.41  | 1.17  | 1.12  | 1.16  | 2.08       | 2.11  | 1.81  | 1.52  | 2.17  | 2.30  | 1.67  | 1.98  | 1.91  | 1.15  | 1.83  | 1.43 |
| G13_SIGNALING_PATHWAY                 | 0.14         | 0.63        | 0.98      | -0.82 | -0.77 | 0.71  | -0.36 | 1.00  | 0.81  | 0.69  | -1.02 | 1.03       | -0.79 | 1.31  | -0.56 | -0.68 | 0.88  | 1.47  | 1.70  | -0.73 | 1.19  | 1.38  | 1.40 |
| ACTIN_CYTOSKELETON_REG_BY_RHO_GTPASES | 0.12         | 0.91        | 0.89      | -0.78 | 0.96  | 1.05  | 0.76  | -0.78 | 1.12  | -0.95 | -1.21 | 1.63       | -0.65 | 0.99  | 1.11  | -0.89 | 1.51  | 1.16  | 1.32  | 1.13  | 1.10  | 1.37  | 1.13 |
| SIG_PIP3_SIGNALING_IN_B_LYMPHOCYTES   | 0.08         | 1.48        | -0.82     | -0.80 | 1.22  | 1.41  | 1.04  | 1.31  | -0.95 | -0.87 | -0.82 | 1.70       | 1.51  | 1.13  | 1.50  | 1.12  | 1.33  | 1.62  | 1.78  | 1.80  | 1.36  | 1.34  | 1.54 |
| ST_GAQ_PATHWAY                        | 0.05         | 1.40        | -0.66     | -0.60 | 1.09  | 0.97  | 1.02  | 1.13  | -0.81 | -0.60 | -1.06 | 1.57       | 1.44  | 1.11  | 1.29  | 0.93  | 1.51  | 1.56  | 1.73  | 1.69  | 1.25  | 1.26  | 1.47 |
| PASSERINI_SIGNAL                      | 0.01         | 1.56        | -0.80     | 1.02  | -0.93 | -0.83 | 1.13  | 1.04  | -0.72 | -0.78 | 0.98  | 1.43       | 1.50  | 1.27  | 2.79  | 1.69  | 1.53  | 1.43  | 1.71  | 1.48  | 1.20  | 1.24  | 1.51 |
| ZF_NEG_REG_OF_CELL_PROLIF             | 0.01         | 1.27        | -0.93     | 0.96  | -0.88 | -0.80 | -0.82 | 1.16  | -0.74 | 1.10  | 1.02  | 1.10       | 1.36  | 0.93  | 1.00  | 1.30  | 1.28  | 1.66  | 1.30  | 1.02  | 1.29  | 1.41  | 1.59 |
| Apoptosis_KEGG                        | -0.02        | 1.53        | -1.12     | 0.83  | 0.96  | -1.58 | -1.08 | -1.03 | 0.89  | 0.93  | 1.02  | 1.59       | 1.43  | 1.46  | 1.49  | 1.75  | 1.75  | 1.21  | 1.55  | 1.84  | 1.35  | 1.34  | 1.55 |
| OKUMURA_MC_LPS                        | -0.02        | 1.48        | -1.17     | 0.96  | -0.76 | -0.89 | -0.83 | 1.20  | -0.81 | 0.95  | 1.14  | 1.86       | 1.21  | 1.47  | 1.59  | 1.25  | 1.79  | 1.62  | 1.52  | 1.36  | 1.35  | 1.31  | 1.44 |
| rac1Pathway                           | -0.05        | 1.41        | -0.95     | -1.09 | 1.04  | -0.91 | 0.98  | 1.22  | -0.88 | 0.98  | -0.82 | 1.22       | 1.32  | 1.13  | 1.45  | 1.55  | 0.83  | 1.75  | 1.52  | 1.36  | 1.65  | 1.57  | 1.53 |
| WNT_MOUSEHHC11_UP                     | -0.05        | 1.56        | -0.86     | -0.81 | 0.95  | 1.12  | 1.00  | -1.00 | -0.93 | -0.80 | 0.84  | 1.72       | 0.98  | 0.92  | 1.65  | 1.90  | 1.22  | 2.11  | 1.92  | 1.13  | 1.59  | 1.78  | 1.84 |
| ST_ERK1_ERK2_MAPK_PATHWAY             | -0.07        | 0.96        | -1.22     | 1.41  | -1.00 | 0.83  | 1.01  | -0.84 | -1.00 | 1.13  | -0.97 | 1.38       | 1.39  | 1.27  | -0.63 | 0.91  | 1.38  | -0.74 | 1.22  | 1.71  | 1.24  | 1.06  | 1.36 |
| ST_FAS_SIGNALING_PATHWAY              | -0.07        | 1.40        | -0.88     | 1.06  | 1.02  | -1.12 | 1.01  | -0.92 | 0.78  | -0.73 | -0.88 | 1.14       | 1.54  | 1.18  | 1.36  | 1.73  | 1.56  | 1.55  | 1.56  | 1.62  | 1.09  | 1.19  | 1.25 |
| GNATENKO_PLATELET                     | -0.08        | 1.26        | 1.16      | 0.92  | -0.79 | -0.84 | -0.80 | 0.96  | -1.14 | -1.11 | 0.92  | 1.34       | 1.65  | 1.63  | 1.47  | 1.56  | 1.45  | 1.59  | 1.64  | 1.12  | -0.73 | 0.96  | 1.42 |
| ST_WNT_BETA_CATENIN_PATHWAY           | -0.09        | 1.32        | 0.86      | -0.76 | -1.42 | -1.01 | -0.96 | -0.85 | 1.13  | 1.37  | 0.85  | 1.18       | 1.32  | 1.10  | 1.61  | 1.54  | 1.81  | 1.79  | 1.42  | 1.71  | -0.67 | 1.65  | 1.42 |
| CELL_CYCLE_REGULATOR                  | -0.09        | 1.64        | 1.20      | -0.93 | 1.12  | -0.83 | -0.79 | 0.86  | -1.12 | 0.73  | -1.04 | 1.56       | 1.58  | 1.40  | 1.60  | 1.40  | 1.99  | 1.77  | 1.74  | 1.61  | 1.90  | 1.16  | 1.94 |
| ST_B_CELL_ANTIGEN_RECEPTOR            | -0.09        | 1.56        | -0.82     | -1.07 | 0.89  | -0.86 | 1.05  | 1.23  | -0.98 | 0.85  | -1.14 | 1.85       | 1.85  | 1.20  | 1.22  | 1.79  | 1.86  | 1.54  | 1.78  | 1.53  | 1.42  | 1.22  | 1.41 |
| TENEDINI_MK                           | -0.12        | 1.14        | -0.91     | -0.96 | 0.82  | -0.99 | -0.64 | 0.78  | 0.82  | 0.92  | -0.92 | 1.36       | 1.59  | 1.56  | -0.58 | 1.60  | 1.57  | 1.31  | 1.64  | -0.57 | 1.43  | 1.11  | 1.65 |
| wntPathway                            | -0.12        | 1.20        | -0.96     | 1.10  | -1.33 | -1.19 | -0.79 | 1.12  | -0.88 | 1.02  | 0.81  | -0.94      | 1.36  | 1.90  | 1.58  | 2.04  | 1.86  | 1.65  | 1.36  | 1.03  | -0.85 | 2.10  | 1.35 |
| ST_G_ALPHA_I_PATHWAY                  | -0.14        | 1.49        | -0.74     | -0.76 | 0.86  | -0.70 | 1.24  | 1.14  | -0.72 | -0.72 | -0.82 | 1.88       | 1.59  | 1.64  | 1.18  | 1.21  | 1.60  | 1.69  | 1.56  | 1.22  | 1.41  | 1.22  | 1.67 |
| DNA_DAMAGE_SIGNALLING                 | -0.14        | 1.58        | -1.01     | 1.02  | -1.06 | -0.87 | -1.09 | 1.00  | -1.08 | 0.89  | 0.94  | 1.57       | 1.43  | 1.60  | 1.59  | 1.92  | 1.65  | 1.35  | 1.73  | 1.97  | 1.19  | 1.29  | 1.65 |
| YAGI_AML_PROGNOSIS                    | -0.15        | 1.08        | -1.12     | 1.49  | -1.04 | 0.63  | 1.15  | 1.14  | -1.52 | -0.77 | -1.32 | 1.27       | -0.59 | 1.19  | 1.25  | 1.16  | 0.76  | 1.68  | 1.56  | 1.01  | 1.40  | 1.14  | 1.10 |
| Glycerophospholipid metabolism        | -0.21        | 0.98        | -0.92     | -0.59 | -1.01 | -0.97 | 1.21  | 1.27  | -0.93 | -1.01 | 1.07  | 1.73       | 1.15  | 0.74  | -1.07 | -0.76 | 1.26  | 1.56  | 1.66  | 1.82  | 1.23  | 0.93  | 1.48 |
| GPCRDB_Other                          | -0.21        | 0.42        | -0.58     | -0.86 | -0.71 | 0.79  | -0.59 | 0.85  | -0.82 | -0.98 | 0.99  | 1.10       | -0.67 | -0.80 | 1.30  | 1.12  | -0.67 | 1.47  | 1.01  | -0.82 | 1.43  | -0.84 | 1.39 |
| IL5_UP_BYSTROM                        | -0.22        | 1.43        | -0.78     | -0.69 | -0.91 | -1.00 | -0.78 | 1.19  | 0.98  | 1.18  | -1.14 | 1.09       | 1.60  | -0.01 | 1.96  | 1.78  | 1.34  | 1.57  | 1.41  | 1.41  | 1.41  | 1.48  | 1.54 |
| Integrin_mediated_cell_adhesion_KEGG  | -0.22        | 0.57        | -0.89     | 0.94  | -0.68 | 0.97  | -0.84 | -0.78 | 1.00  | -0.75 | -0.94 | -0.68      | 0.86  | 1.14  | -0.75 | -0.78 | -0.70 | 1.52  | 1.44  | 1.28  | 1.16  | 1.18  | 1.15 |
| Glutathione metabolism                | -0.23        | 1.37        | -0.73     | -1.00 | -0.74 | -0.72 | 1.08  | 1.11  | -0.95 | 0.84  | -0.96 | 1.13       | 1.24  | 0.89  | 1.42  | 1.69  | 1.35  | 1.54  | 1.86  | 1.01  | 1.38  | 1.56  | 1.41 |
| alkPathway                            | -0.23        | 1.09        | 0.75      | -0.63 | -0.87 | -0.82 | -1.00 | -0.73 | -0.54 | 0.77  | 0.97  | 0.90       | 1.74  | 1.41  | 1.67  | 0.69  | 1.40  | 1.21  | -0.57 | 0.73  | 1.40  | 1.59  | 0.92 |
| ST_DICTY_DISCOIDEUM_CAMP_CHEMOTAXIS   | -0.28        | 1.57        | -0.68     | -0.94 | 0.92  | -0.79 | 0.90  | 0.87  | -0.88 | -0.96 | 1.77  | 1.73       | 1.84  | 1.60  | 0.89  | 1.51  | 1.63  | 1.91  | 1.56  | 1.27  | 1.54  | 1.53  |      |
| PML_RAR_ROSS                          | -0.30        | 1.17        | -1.14     | 0.92  | -1.12 | -0.95 | 0.83  | -0.62 | -0.74 | -0.85 | 0.95  | 1.41       | -0.81 | 1.55  | 1.27  | 1.66  | 1.06  | 1.57  | 1.63  | 1.04  | 0.96  | 1.34  | 1.41 |
| Inflammatory_Response_Pathway         | -0.32        | 0.93        | -1.25     | -0.90 | -0.67 | 0.99  | 0.76  | -1.05 | -0.82 | -0.75 | 0.83  | -0.85      | -0.87 | -0.65 | 1.56  | 1.63  | 1.45  | 1.96  | 1.20  | 1.10  | 1.70  | 1.29  | 1.67 |
| mcalpainPathway                       | -0.33        | 1.39        | 0.52      | -0.93 | -0.56 | -0.95 | 0.84  | -0.84 | -1.22 | -0.78 | 0.94  | 1.50       | 1.69  | 1.31  | 1.62  | 1.79  | 1.41  | 1.92  | 1.43  | 1.55  | 1.86  | -0.85 | 1.42 |
| ST_T_CELL_SIGNAL_TRANSDUCTION         | -0.35        | 1.08        | -1.04     | -0.81 | -0.81 | -0.99 | 0.68  | -1.00 | 0.92  | 0.81  | -0.90 | 1.39       | -0.65 | 0.86  | 1.39  | 1.33  | 1.19  | 1.43  | 1.20  | 1.18  | 0.97  | 1.23  | 1.44 |
| ST_P38_MAPK_PATHWAY                   | -0.35        | 1.61        | -0.90     | 1.03  | 1.08  | -1.11 | -1.00 | -1.05 | -0.76 | 1.07  | -1.53 | 1.54       | 1.59  | 1.83  | 1.87  | 1.76  | 1.67  | 1.39  | 1.77  | 1.64  | 1.53  | 1.18  | 1.58 |
| HADDAD_10VS7                          | -0.38        | 1.53        | -0.97     | -0.86 | -0.74 | -0.88 | -0.01 | -0.92 | -0.91 | 0.95  | 0.95  | 1.52       | 1.47  | 1.52  | 1.56  | 1.52  | 1.58  | 1.39  | 1.88  | 1.56  | 1.49  | 1.41  | 1.42 |

| NAME                              | Ave Preg NES | Ave Inv NES | Lactation |       |       |       |       |       |       |       |       | Involution |       |       |       |       |       |       |      |       |       |       |       |
|-----------------------------------|--------------|-------------|-----------|-------|-------|-------|-------|-------|-------|-------|-------|------------|-------|-------|-------|-------|-------|-------|------|-------|-------|-------|-------|
|                                   |              |             | Day 1     |       |       | Day 3 |       |       | Day 7 |       |       | Day 1      |       |       | Day 2 |       |       | Day 3 |      |       | Day 4 |       |       |
|                                   |              |             | A         | B     | C     | A     | B     | C     | A     | B     | C     | A          | B     | C     | A     | B     | C     | A     | B    | C     | A     | B     | C     |
| ecmPathway                        | -0.38        | 1.48        | -1.18     | -1.17 | -0.86 | 0.61  | 0.90  | -0.77 | -1.03 | -0.78 | 0.84  | 0.95       | 2.12  | 1.64  | 1.69  | 1.42  | 1.73  | 1.53  | 1.54 | 1.00  | 1.48  | 1.33  | 1.36  |
| LK_DOWN_MAGRANGEAS                | -0.40        | 1.13        | 0.90      | -0.55 | -0.81 | -0.92 | -0.67 | -0.88 | 1.12  | -1.03 | -0.75 | 1.09       | 1.06  | 1.22  | 2.00  | 1.38  | 1.11  | 1.21  | 1.74 | 1.08  | 1.11  | -0.68 | 1.26  |
| ST_INTEGRIN_SIGNALING_PATHWAY     | -0.43        | 1.42        | -0.86     | -0.72 | -0.68 | -0.74 | 0.93  | -0.80 | -0.84 | 0.69  | -0.81 | 1.43       | 1.12  | 1.16  | 1.58  | 1.18  | 1.67  | 1.71  | 1.95 | 1.80  | 1.16  | 1.14  | 1.18  |
| CELL_GROWTH_AND_OR_MAINTENANCE    | -0.44        | 1.19        | -0.87     | -1.04 | -0.68 | -1.04 | -0.82 | 1.07  | -0.83 | -0.73 | 1.01  | 1.26       | 1.19  | 1.21  | 0.97  | 1.43  | 1.13  | 1.37  | 0.92 | 1.07  | 1.19  | 1.12  | 1.49  |
| Striated_muscle_contraction       | -0.44        | 1.04        | -0.85     | -0.57 | -0.65 | -0.88 | 0.63  | -1.05 | -0.61 | -1.11 | 1.11  | -0.66      | 1.41  | 1.84  | 0.94  | -0.52 | 1.82  | 1.73  | 1.20 | 1.19  | 0.99  | 1.29  | 1.21  |
| ST_TUMOR_NECROSIS_FACTOR_PATHWAY  | -0.45        | 1.32        | -0.74     | 0.89  | -0.65 | -1.04 | -0.91 | -1.00 | -0.69 | 0.86  | -0.75 | 1.37       | 1.18  | 0.89  | 1.31  | 1.30  | 1.36  | 1.45  | 1.95 | 1.58  | 0.81  | 0.95  | 1.64  |
| pyk2Pathway                       | -0.46        | 0.89        | -1.32     | -0.88 | 0.78  | -1.13 | -0.21 | -0.82 | -0.70 | -0.76 | 0.93  | 1.01       | 1.85  | 1.64  | 0.73  | -0.69 | 1.22  | -0.76 | 0.92 | 1.35  | 1.18  | 1.03  | 1.25  |
| FETAL_LIVER_VS_ADULT_LIVER_GNF2   | -0.47        | 1.22        | -0.67     | -0.79 | -0.77 | -0.94 | -0.97 | 0.87  | -0.97 | 0.82  | -0.80 | 1.14       | -0.99 | 1.22  | 1.75  | 1.42  | 1.61  | 1.44  | 1.42 | 1.49  | 1.15  | 1.38  | 1.56  |
| BRENTANI_SIGNALLING               | -0.49        | 1.61        | -1.27     | -1.19 | -1.00 | -1.04 | 0.00  | 1.10  | -0.96 | -1.00 | 0.93  | 1.41       | 1.30  | 1.44  | 1.61  | 1.73  | 2.08  | 1.57  | 1.77 | 1.64  | 1.50  | 1.69  | 1.59  |
| biopeptidesPathway                | -0.50        | 1.37        | -1.35     | -0.85 | -0.81 | -1.30 | -0.13 | -0.79 | 0.72  | -0.94 | 1.03  | 1.47       | 1.99  | 1.97  | 1.69  | 1.36  | 1.60  | 1.20  | 1.42 | 1.26  | 1.37  | 1.07  | 1.49  |
| CELL_CYCLE                        | -0.51        | 1.61        | -1.11     | -0.80 | -0.74 | -1.01 | -0.92 | 0.81  | -1.03 | 0.95  | -0.76 | 1.63       | 1.44  | 1.52  | 2.05  | 1.88  | 1.73  | 1.54  | 1.75 | 1.21  | 1.59  | 1.33  | 1.68  |
| MOUSE_CIP_UP                      | -0.53        | 1.48        | -1.14     | -1.00 | -0.80 | -1.13 | -0.86 | -0.88 | 0.86  | 1.09  | -0.88 | 1.51       | 1.29  | 1.13  | 1.75  | 1.70  | 1.12  | 1.53  | 1.63 | 1.56  | 1.54  | 1.71  | 1.26  |
| HEMO_TRANSCRIPTION_FACTORS        | -0.54        | 1.78        | -1.19     | -0.77 | -1.01 | -1.12 | -0.81 | -0.86 | 0.84  | -0.78 | 0.86  | 1.47       | 1.36  | 1.28  | 2.09  | 2.18  | 1.77  | 1.95  | 1.83 | 2.19  | 1.70  | 1.64  | 1.85  |
| MOUSE_DENA_DOWN                   | -0.58        | 0.72        | -0.94     | -0.78 | -0.74 | -0.79 | -0.67 | 1.15  | -0.83 | -0.71 | -0.87 | -0.80      | 0.93  | -0.92 | 1.42  | 1.49  | -0.64 | 1.65  | 1.10 | 1.25  | 1.02  | 0.88  | 1.31  |
| deathPathway                      | -0.62        | 1.49        | -1.31     | -0.88 | 0.95  | -1.39 | -1.08 | -0.67 | -0.91 | 0.94  | -1.23 | 1.89       | 1.54  | 1.53  | 1.21  | 1.86  | 1.51  | 1.35  | 1.34 | 1.54  | 1.20  | 1.45  | 1.50  |
| Smooth_muscle_contraction         | -0.63        | 1.56        | -1.10     | -0.75 | -0.97 | 0.94  | -0.04 | -0.96 | -0.79 | -1.17 | -0.78 | 1.62       | 1.45  | 1.24  | 1.58  | 1.82  | 1.68  | 1.65  | 1.76 | 1.59  | 1.73  | 1.28  | 1.38  |
| JISON_STRESS                      | -0.65        | 1.85        | -1.18     | 1.33  | -1.13 | -1.13 | -1.00 | -1.37 | 0.96  | -1.25 | -1.05 | 2.15       | 1.34  | 1.76  | 1.92  | 2.11  | 1.71  | 1.72  | 1.82 | 1.99  | 1.85  | 1.82  | 1.98  |
| HOXA9_UP_DORSAM                   | -0.67        | 1.65        | -1.11     | -1.15 | -1.13 | -1.15 | -1.73 | 0.95  | -1.32 | 1.05  | -1.42 | 1.60       | 1.45  | 1.65  | 1.91  | 1.64  | 1.33  | 1.91  | 1.65 | 1.63  | 1.65  | 1.42  | 1.91  |
| BREAST_CANCER_ESTROGEN_SIGNALLING | -0.68        | 1.72        | -0.92     | -0.79 | -0.96 | -1.00 | -0.84 | -0.85 | -0.90 | -1.03 | 1.16  | 1.59       | 1.61  | 1.82  | 1.87  | 2.18  | 1.81  | 1.63  | 1.81 | 1.61  | 1.59  | 1.35  | 1.72  |
| COPD_DOWN_NING                    | -0.73        | 1.49        | -0.67     | -1.08 | -1.28 | -0.96 | -0.91 | -0.80 | -1.08 | -0.81 | 1.04  | 1.10       | 1.28  | 0.00  | 1.62  | 1.88  | 1.65  | 1.79  | 1.57 | 1.87  | 1.83  | 1.51  | 1.80  |
| SA_B_CELL_RECEPTOR_COMPLEXES      | -0.77        | 1.58        | -1.13     | -1.18 | -0.91 | -1.06 | 1.12  | -0.98 | -0.94 | -0.75 | -1.08 | 1.46       | 1.65  | 2.12  | 1.21  | 1.72  | 1.14  | 1.52  | 1.69 | 1.67  | 1.88  | 1.61  | 1.27  |
| fasPathway                        | -0.78        | 1.59        | -1.47     | -0.96 | 0.97  | -0.77 | -1.16 | -0.94 | -1.00 | -0.75 | -0.95 | 1.58       | 1.42  | 1.43  | 1.56  | 1.81  | 1.70  | 1.90  | 1.44 | 1.45  | 1.79  | 1.64  | 1.40  |
| MAPK_CASCADE                      | -0.79        | 1.54        | -1.29     | -1.17 | 0.89  | -1.56 | 0.68  | -1.58 | -1.03 | -0.86 | -1.17 | 1.13       | 1.75  | 1.49  | 1.88  | 1.31  | 1.71  | 1.03  | 1.81 | 1.81  | 1.40  | 1.49  | 1.68  |
| nfbkPathway                       | -0.81        | 1.64        | -0.86     | -1.32 | -1.05 | -1.09 | -1.44 | 0.92  | -0.89 | -0.64 | -0.96 | 1.67       | 1.50  | 1.66  | 1.96  | 1.72  | 1.70  | 1.36  | 2.36 | 1.49  | 1.27  | 1.24  | 1.74  |
| RNA_transcription_Reactome        | -0.82        | 0.67        | -0.85     | 0.84  | -0.77 | -1.34 | -0.89 | -0.92 | -1.31 | -1.07 | -1.05 | 1.50       | 1.04  | 1.02  | 1.21  | 1.07  | 1.42  | -0.72 | 1.24 | -0.81 | 1.16  | 0.70  | -0.77 |
| ER_DOWN_FRASOR                    | -0.82        | 2.11        | 1.15      | -1.87 | -1.35 | -1.30 | -1.48 | -1.27 | 0.88  | -1.14 | -1.04 | 2.06       | 2.27  | 2.19  | 2.72  | 2.38  | 2.26  | 1.86  | 1.94 | 2.35  | 1.46  | 1.85  | 1.98  |
| KRAS_TOP100_CONTROL_CORDERO       | -0.83        | 1.54        | -1.16     | 1.08  | -1.30 | -0.92 | -1.02 | -1.00 | -1.09 | -1.17 | -1.02 | 1.01       | 1.60  | 1.87  | 2.09  | 1.93  | 1.94  | 1.74  | 1.63 | 2.14  | 1.20  | 1.52  | 1.79  |
| cellcyclePathway                  | -0.84        | 2.00        | -1.11     | -0.92 | -1.23 | -1.14 | -0.93 | -0.92 | -1.23 | -0.94 | 0.92  | 2.00       | 1.81  | 2.14  | 2.32  | 1.78  | 1.77  | 1.92  | 2.02 | 1.95  | 1.99  | 1.91  | 2.38  |
| IFNA_HT1080_UP                    | -0.84        | 1.88        | -1.41     | -0.96 | -1.09 | -1.29 | -0.95 | 0.96  | -0.86 | -1.23 | -0.75 | 1.85       | 1.73  | 1.54  | 1.98  | 1.59  | 2.24  | 2.03  | 2.14 | 2.62  | 1.66  | 1.32  | 1.85  |
| egfPathway                        | -0.85        | 1.89        | -1.35     | -1.13 | -0.93 | -1.23 | 1.03  | -1.11 | -1.09 | -0.95 | -0.86 | 1.70       | 1.99  | 2.15  | 2.23  | 2.19  | 1.67  | 2.00  | 1.90 | 1.44  | 2.15  | 1.52  | 1.74  |
| GOLDRATH_MEMORY                   | -0.85        | 1.81        | -0.96     | -0.94 | -1.30 | -1.24 | -0.90 | -1.04 | -1.30 | -1.03 | 1.08  | 1.42       | 1.79  | 1.57  | 2.20  | 2.10  | 1.98  | 2.05  | 2.08 | 1.62  | 1.71  | 1.61  | 1.84  |
| Fatty acid metabolism             | -0.85        | 1.59        | -1.18     | -0.97 | -1.04 | -1.36 | -0.77 | -1.06 | -1.30 | -1.24 | 1.24  | 1.25       | 1.84  | 1.54  | 1.85  | 1.54  | 1.68  | 1.65  | 1.66 | 1.62  | 1.71  | 1.07  | 1.67  |
| PROTEASOME_DEGRADATION            | -0.85        | 1.44        | 1.52      | -1.41 | -1.30 | -1.02 | -1.20 | -1.18 | -1.16 | -1.03 | -0.89 | 1.45       | 1.67  | 1.47  | 1.94  | 1.90  | 1.65  | 1.22  | 2.03 | 1.77  | -0.98 | 1.54  | 1.61  |
| CA_NF_AT_SIGNALLING               | -0.85        | 1.53        | -0.97     | -0.96 | -1.04 | -1.15 | -0.06 | -0.74 | -0.95 | -0.87 | -0.94 | 1.23       | 1.06  | 1.19  | 1.80  | 1.81  | 1.55  | 1.65  | 1.65 | 1.54  | 1.61  | 1.81  | 1.42  |
| Apoptosis_GenMAPP                 | -0.87        | 1.70        | -1.10     | -0.83 | -0.85 | -1.66 | -1.18 | -0.99 | -0.87 | 0.79  | -1.14 | 1.67       | 1.55  | 1.86  | 1.48  | 2.20  | 1.89  | 1.12  | 1.92 | 1.89  | 1.44  | 1.51  | 1.88  |
| par1Pathway                       | -0.87        | 1.41        | -0.96     | -1.26 | -1.26 | -0.93 | -1.00 | 0.70  | -1.11 | -1.25 | -0.80 | 1.30       | 1.71  | 1.36  | 1.40  | 1.57  | 1.71  | 1.59  | 1.56 | 0.96  | 1.16  | 1.13  | 1.43  |
| tpoPathway                        | -0.89        | 1.91        | -1.06     | -1.33 | -1.40 | -1.48 | 1.03  | -0.95 | -0.96 | -1.16 | -0.73 | 1.67       | 2.13  | 2.33  | 2.21  | 1.95  | 1.73  | 2.06  | 1.91 | 1.55  | 2.11  | 1.50  | 1.72  |
| TUMOR_SUPPRESSOR                  | -0.90        | 1.60        | -1.27     | -0.95 | -1.01 | -1.02 | -0.99 | -0.86 | -1.38 | 0.66  | -1.29 | 1.75       | 1.44  | 1.58  | 1.75  | 1.26  | 1.68  | 1.74  | 1.34 | 1.38  | 1.57  | 2.01  | 1.76  |
| g1Pathway                         | -0.91        | 2.06        | -1.25     | -0.97 | -1.26 | -1.54 | -0.98 | -0.95 | -1.15 | -0.92 | 0.88  | 2.07       | 2.06  | 2.21  | 2.54  | 2.45  | 1.85  | 1.64  | 1.74 | 1.89  | 2.07  | 1.87  | 2.38  |
| CELL_ADHESION_MOLECULE_ACTIVITY   | -0.91        | 1.07        | -0.82     | -0.97 | -0.99 | -0.89 | -0.94 | -1.03 | -0.83 | -0.80 | -0.91 | -0.96      | -0.84 | 1.22  | 1.73  | 1.43  | 1.37  | 1.74  | 1.41 | 1.66  | 1.37  | 1.31  | 1.44  |
| SIG_CHEMOTAXIS                    | -0.92        | 1.67        | -0.96     | -0.99 | -0.89 | -0.76 | -0.68 | -0.91 | -1.04 | -1.00 | -1.03 | 1.79       | 1.63  | 1.30  | 1.80  | 0.95  | 1.92  | 1.84  | 1.97 | 1.68  | 1.54  | 1.63  | 1.98  |
| PASSERINI_EM                      | -0.93        | 0.99        | -1.19     | -1.04 | -1.11 | -1.09 | -1.18 | -1.09 | -0.08 | -0.75 | -0.83 | -0.98      | -0.90 | -0.93 | 2.06  | 2.19  | 1.14  | 1.60  | 2.13 | 1.54  | 1.32  | 1.34  | 1.32  |
| MAPK_Cascade                      | -0.93        | 1.55        | -1.44     | -1.04 | 0.84  | -1.29 | -0.92 | -1.52 | -0.99 | -0.86 | -1.20 | 1.00       | 1.73  | 1.41  | 2.22  | 1.39  | 1.68  | 1.09  | 1.90 | 1.80  | 1.49  | 1.21  | 1.72  |
| CELL_ADHESION                     | -0.94        | 1.24        | -0.65     | -0.93 | -0.93 | -1.05 | -0.90 | -0.96 | -0.92 | -0.86 | -1.23 | 1.11       | -0.83 | 1.21  | 1.25  | 1.60  | 1.46  | 1.66  | 1.75 | 1.64  | 1.42  | 1.32  | 1.34  |
| G_Protein_Signaling               | -0.94        | 1.64        | -1.10     | -1.13 | -1.05 | -1.02 | -0.15 | -0.99 | -1.07 | -0.92 | -1.05 | 1.31       | 1.51  | 0.91  | 2.01  | 1.99  | 2.05  | 1.53  | 1.97 | 1.80  | 1.74  | 1.27  | 1.59  |

| NAME                               | Ave Preg NES | Ave Inv NES | Lactation |       |       |       |       |       |       |       |       | Involution |       |       |       |       |       |       |      |       |       |      |      |
|------------------------------------|--------------|-------------|-----------|-------|-------|-------|-------|-------|-------|-------|-------|------------|-------|-------|-------|-------|-------|-------|------|-------|-------|------|------|
|                                    |              |             | Day 1     |       |       | Day 3 |       |       | Day 7 |       |       | Day 1      |       |       | Day 2 |       |       | Day 3 |      |       | Day 4 |      |      |
|                                    |              |             | A         | B     | C     | A     | B     | C     | A     | B     | C     | A          | B     | C     | A     | B     | C     | A     | B    | C     | A     | B    | C    |
| ALMM_UP_ABRAHAM                    | -0.94        | 1.26        | -1.10     | -0.80 | -0.83 | -0.96 | -0.88 | -1.04 | -0.96 | -0.95 | -0.95 | -0.84      | 1.19  | 1.13  | 1.47  | 1.71  | 1.70  | 1.38  | 1.87 | 1.02  | 1.64  | 1.37 | 1.47 |
| at1rPathway                        | -0.95        | 1.42        | -1.08     | -1.17 | -0.98 | -1.23 | -0.21 | -1.19 | -0.93 | -0.87 | -0.84 | 1.64       | 2.00  | 1.59  | 1.61  | 0.90  | 1.19  | 1.42  | 1.50 | 1.45  | 0.96  | 1.21 | 1.54 |
| SIG_BCR_SIGNALING_PATHWAY          | -0.95        | 1.60        | -0.86     | -1.12 | -0.99 | -0.96 | -0.85 | -0.72 | -1.08 | -0.95 | -1.02 | 1.75       | 1.62  | 1.37  | 1.44  | 1.64  | 1.52  | 1.62  | 1.93 | 1.68  | 1.61  | 1.39 | 1.63 |
| fcgr1Pathway                       | -0.95        | 1.46        | -1.15     | -1.31 | -1.07 | -1.24 | -0.17 | -0.94 | -0.94 | -0.83 | -0.92 | 1.29       | 1.44  | 1.47  | 1.35  | 1.51  | 1.51  | 1.41  | 1.50 | 1.62  | 1.54  | 1.51 | 1.43 |
| MOUSE_ACOX1_UP                     | -0.97        | 1.86        | -1.75     | -1.19 | -0.99 | -1.27 | -0.92 | -1.16 | 0.89  | -1.11 | -1.18 | 1.97       | 1.78  | 1.65  | 2.34  | 1.72  | 1.41  | 1.90  | 1.99 | 2.10  | 1.84  | 1.85 | 1.73 |
| HYPOXIA_UP_MANALO                  | -0.97        | 1.65        | -1.45     | -1.06 | -0.84 | -1.02 | -0.79 | -1.03 | -0.90 | -0.87 | -0.77 | 1.82       | 1.77  | 1.62  | 1.44  | 1.79  | 1.67  | 1.44  | 1.85 | 1.71  | 1.74  | 1.44 | 1.50 |
| igf1Pathway                        | -0.97        | 1.82        | -1.27     | -1.14 | -1.33 | -1.40 | 0.77  | -1.13 | -1.10 | -1.26 | -0.89 | 1.39       | 1.81  | 2.07  | 2.18  | 2.08  | 1.59  | 2.03  | 1.72 | 1.62  | 2.19  | 1.73 | 1.49 |
| IFNA_HEPATO_UP                     | -0.98        | 1.13        | -1.44     | -0.90 | -1.01 | -1.10 | -0.94 | -0.79 | -0.90 | -1.02 | -0.71 | 1.00       | -0.70 | 1.27  | 1.56  | 1.31  | -0.93 | 1.54  | 1.83 | 1.85  | 1.51  | 1.52 | 1.83 |
| Matrix_Metalloproteinases          | -0.98        | 0.55        | -1.11     | -0.65 | -0.94 | -1.15 | -0.98 | -0.95 | -1.01 | -0.95 | -1.10 | -0.66      | -1.07 | -1.07 | 0.39  | 1.37  | -0.57 | 1.37  | 1.41 | 1.43  | 1.28  | 1.39 | 1.32 |
| bcrPathway                         | -0.99        | 1.31        | -1.18     | -1.27 | -0.84 | -1.36 | -0.15 | -1.13 | -0.87 | -0.88 | -1.18 | 1.21       | 1.39  | 2.09  | -0.89 | 1.47  | 1.20  | 1.43  | 1.40 | 1.70  | 1.64  | 1.67 | 1.47 |
| ngfPathway                         | -0.99        | 1.74        | -1.35     | -1.18 | -1.37 | -1.22 | 0.85  | -1.31 | -0.98 | -1.12 | -1.19 | 1.24       | 1.81  | 2.11  | 1.85  | 1.89  | 1.46  | 1.94  | 1.62 | 1.68  | 1.96  | 1.70 | 1.60 |
| rhoPathway                         | -1.00        | 1.73        | -1.08     | -1.29 | -1.13 | -1.04 | -0.76 | -0.90 | -0.88 | -1.06 | -0.83 | 1.24       | 2.32  | 1.56  | 1.87  | 1.51  | 1.90  | 1.89  | 1.69 | 1.35  | 1.74  | 1.84 | 1.82 |
| fmlpPathway                        | -1.00        | 1.69        | -1.25     | -0.81 | -1.11 | -1.53 | -0.24 | -0.90 | -1.09 | -1.02 | -1.09 | 1.51       | 1.57  | 2.18  | 1.81  | 1.66  | 1.75  | 1.49  | 1.81 | 1.97  | 1.43  | 1.53 | 1.63 |
| HUMAN_CD34_ENRICHED_TF             | -1.01        | 1.87        | -1.29     | -0.96 | -1.02 | -1.37 | -0.94 | -1.39 | -1.13 | -0.90 | -0.06 | 1.74       | 1.66  | 1.45  | 2.18  | 2.21  | 2.00  | 1.83  | 1.92 | 1.85  | 1.86  | 1.98 | 1.73 |
| GO_ROS                             | -1.01        | 1.06        | -0.84     | -0.63 | -0.94 | -1.37 | -1.09 | -0.94 | -1.50 | -0.96 | -0.81 | 0.79       | -0.85 | -0.83 | 1.68  | 1.47  | 1.14  | 1.66  | 1.09 | 1.58  | 1.61  | 1.53 | 1.83 |
| MOUSE_CIP_DOWN                     | -1.01        | 1.08        | -1.09     | -0.79 | -0.82 | -0.98 | -1.03 | -1.13 | -0.98 | -0.94 | -1.34 | -0.89      | 1.01  | 1.03  | 1.19  | 1.89  | 1.15  | 1.69  | 1.37 | 0.91  | 1.23  | 1.00 | 1.43 |
| SURVIVAL_ALL_POOR                  | -1.01        | 1.74        | 0.87      | -1.24 | -1.54 | -1.10 | -1.25 | -1.48 | -1.19 | -1.04 | -1.16 | 1.74       | 2.10  | 0.00  | 2.05  | 1.88  | 2.12  | 1.78  | 2.07 | 2.07  | 1.39  | 1.80 | 1.82 |
| CELL_ADHESION_RECEPTOR_ACTIVITY    | -1.02        | 0.99        | -1.09     | -0.80 | -1.17 | -0.82 | -0.93 | -1.30 | -0.96 | -1.01 | -1.10 | 0.92       | 0.88  | -0.69 | -0.81 | 1.30  | 1.35  | 1.62  | 1.55 | 1.59  | 1.22  | 1.50 | 1.44 |
| SIG_CD40PATHWAYMAP                 | -1.02        | 1.58        | -1.05     | -0.86 | -0.88 | -1.02 | -1.02 | -0.93 | -1.56 | -0.88 | -1.00 | 1.44       | 1.79  | 1.36  | 2.00  | 1.49  | 1.68  | 1.64  | 1.28 | 1.85  | 1.37  | 1.59 | 1.48 |
| CHEN_LUNG_SURVIVAL                 | -1.02        | 2.10        | -1.21     | 1.09  | -1.65 | -1.89 | -1.00 | -1.41 | -1.31 | -1.03 | -0.79 | 2.14       | 1.95  | 2.26  | 2.38  | 1.84  | 2.77  | 1.88  | 2.62 | 1.87  | 2.14  | 1.40 | 1.97 |
| CELL_CYCLE_ARREST                  | -1.04        | 1.69        | -1.22     | -1.01 | -1.51 | -1.48 | -1.18 | -1.25 | -1.39 | 0.78  | -1.09 | 1.69       | 1.05  | 1.49  | 2.17  | 1.92  | 1.94  | 1.62  | 2.08 | 1.68  | 1.49  | 1.45 | 1.65 |
| BMYP_MORPHOLINO_UP_SHEPARD         | -1.04        | 1.94        | -1.21     | -1.14 | -1.03 | -1.29 | -1.34 | -0.99 | -0.15 | -1.11 | -1.11 | 1.80       | 1.80  | 1.86  | 1.93  | 1.97  | 1.89  | 2.06  | 2.45 | 2.27  | 1.92  | 1.65 | 1.67 |
| IL6_BROCKE                         | -1.04        | 1.99        | -1.25     | -1.15 | -0.91 | -1.02 | -0.76 | -1.00 | -1.10 | -1.06 | -1.14 | 2.17       | 1.99  | 2.02  | 2.25  | 2.16  | 2.02  | 1.95  | 2.15 | 1.94  | 1.73  | 1.77 | 1.78 |
| insulinPathway                     | -1.05        | 1.85        | -1.39     | -1.23 | -1.37 | -1.47 | 0.71  | -1.31 | -1.16 | -1.23 | -1.02 | 1.39       | 1.77  | 1.79  | 2.24  | 1.93  | 1.63  | 2.06  | 1.89 | 1.74  | 2.13  | 1.89 | 1.73 |
| cardiacegfPathway                  | -1.05        | 1.70        | -1.49     | -1.03 | -1.02 | -1.11 | -0.97 | -0.72 | -1.15 | -0.97 | -1.04 | 1.66       | 1.73  | 2.15  | 1.74  | 1.84  | 1.42  | 1.32  | 1.90 | 2.15  | 1.63  | 1.38 | 1.46 |
| EMT_UP_JECHLINGER                  | -1.06        | 1.27        | -1.17     | -1.13 | -1.18 | -1.09 | -0.89 | -1.16 | -0.87 | -1.04 | -0.99 | 1.30       | 1.36  | 1.50  | 1.41  | 1.48  | -0.88 | 1.63  | 1.40 | 1.56  | 1.43  | 1.48 | 1.52 |
| il1rPathway                        | -1.07        | 1.58        | -0.98     | -1.49 | -1.26 | -1.28 | -1.01 | -1.07 | -0.79 | -0.77 | -1.00 | 1.33       | 1.58  | 1.71  | 2.35  | 1.57  | 1.67  | 1.32  | 1.33 | 1.69  | 1.73  | 1.50 | 1.24 |
| TH_UP_KIM                          | -1.07        | 1.15        | -0.83     | -1.12 | -0.83 | -1.02 | -1.29 | -1.09 | -1.11 | -1.02 | -1.33 | 1.80       | 1.10  | 1.31  | 1.49  | -0.56 | 1.21  | 1.69  | 1.50 | -0.53 | 1.71  | 1.53 | 1.57 |
| IFNG_5ENDOTHELIAL_UP               | -1.08        | 1.66        | -1.40     | -1.03 | -1.18 | -1.12 | -0.89 | -0.95 | -1.09 | -1.28 | -0.79 | 1.57       | 1.97  | 1.33  | 1.60  | 1.82  | 1.57  | 1.71  | 1.78 | 2.04  | 1.80  | 1.36 | 1.41 |
| tnfr1Pathway                       | -1.09        | 1.78        | -1.41     | -1.22 | -1.02 | -1.00 | -1.13 | -1.12 | -1.04 | -0.79 | -1.09 | 1.77       | 1.63  | 1.39  | 1.91  | 2.02  | 1.89  | 1.89  | 1.66 | 1.89  | 2.26  | 1.52 | 1.59 |
| RAS_STROMA_DOWN_CROONQUIST         | -1.10        | 1.65        | -0.96     | -1.11 | -1.20 | -1.34 | -1.08 | -0.90 | -1.08 | -1.44 | -0.75 | 1.41       | 1.29  | 1.52  | 1.92  | 1.82  | 1.76  | 1.80  | 1.92 | 1.97  | 1.56  | 1.37 | 1.47 |
| proteasomePathway                  | -1.10        | 1.31        | -1.13     | -1.16 | -0.86 | -1.40 | -0.89 | -1.02 | -1.33 | -1.01 | -1.09 | 1.37       | 1.29  | 1.20  | 1.57  | 1.71  | 1.78  | 0.79  | 1.91 | 1.77  | -0.97 | 1.76 | 1.54 |
| PASSERINI_TRANSCRIPTION            | -1.11        | 1.71        | -1.05     | -0.98 | -1.57 | -1.00 | -1.12 | -1.40 | -0.99 | -0.92 | -1.00 | 1.80       | 1.49  | 2.24  | 1.45  | 1.91  | 1.74  | 1.76  | 1.70 | 1.44  | 1.43  | 1.67 | 1.93 |
| TGF_BETA_SIGNALING_PATHWAY         | -1.12        | 1.91        | -1.18     | -1.14 | -1.01 | -1.09 | -1.13 | -1.14 | -1.26 | -0.86 | -1.22 | 1.74       | 1.95  | 2.02  | 1.90  | 1.97  | 2.14  | 1.72  | 2.16 | 1.67  | 1.97  | 1.91 | 1.79 |
| BRENTANI_PROTEIN_MODIFICATION      | -1.12        | 1.95        | -1.17     | -1.13 | -1.13 | -1.07 | -0.95 | -1.04 | -1.22 | -1.23 | -1.17 | 1.79       | 1.60  | 1.94  | 1.96  | 2.15  | 2.24  | 2.20  | 2.31 | 1.89  | 1.78  | 1.66 | 1.88 |
| DRUG_RESISTANCE_AND_METABOLISM     | -1.13        | 1.94        | -1.26     | -0.96 | -1.23 | -1.16 | -1.25 | -0.94 | -1.27 | -1.18 | -0.88 | 1.95       | 1.76  | 2.21  | 1.82  | 2.17  | 1.85  | 1.82  | 2.11 | 2.12  | 1.77  | 1.77 | 1.98 |
| IFNG_HT1080_UP                     | -1.13        | 1.81        | -1.34     | -0.97 | -1.15 | -1.57 | -1.12 | -0.91 | -0.85 | -1.32 | -0.90 | 1.84       | 1.70  | 1.60  | 1.86  | 1.50  | 2.20  | 1.94  | 2.10 | 2.31  | 1.49  | 1.38 | 1.73 |
| PASSERINI_ADHESION                 | -1.13        | 1.27        | -0.82     | -1.05 | -1.29 | -1.18 | -1.14 | -1.34 | -1.14 | -1.16 | -1.03 | 2.20       | 1.44  | 1.42  | 1.04  | 1.67  | 1.39  | 1.38  | 1.04 | 1.29  | 1.26  | 1.02 | 1.13 |
| Prostaglandin_synthesis_regulation | -1.14        | 2.12        | -1.00     | -1.26 | -1.42 | -1.52 | -1.00 | -1.13 | -0.93 | -0.90 | -1.07 | 1.86       | 2.37  | 2.42  | 2.60  | 2.37  | 1.93  | 1.98  | 2.22 | 2.44  | 1.99  | 1.48 | 1.77 |
| Apoptosis                          | -1.14        | 1.79        | -1.32     | -1.11 | -0.93 | -1.49 | -1.16 | -1.09 | -0.95 | -0.90 | -1.27 | 1.69       | 1.60  | 1.59  | 1.70  | 1.80  | 1.94  | 1.45  | 1.92 | 2.06  | 2.07  | 1.69 | 2.01 |
| MLL_FUSION_ROSS                    | -1.14        | 1.85        | -0.92     | -1.00 | -1.15 | -1.32 | -1.17 | -1.11 | -1.14 | -1.24 | -1.23 | 1.66       | 1.66  | 1.67  | 2.14  | 1.78  | 2.23  | 1.83  | 1.99 | 2.11  | 1.60  | 1.67 | 1.83 |
| vipPathway                         | -1.16        | 1.65        | -1.13     | -1.23 | -1.49 | -1.56 | -0.23 | -1.25 | -1.13 | -1.00 | -1.40 | 1.65       | 1.37  | 1.75  | 1.59  | 1.98  | 1.88  | 1.23  | 2.05 | 1.64  | 1.60  | 1.63 | 1.42 |
| tcRPathway                         | -1.16        | 1.83        | -1.40     | -1.54 | -1.28 | -1.56 | -0.15 | -1.13 | -1.17 | -1.01 | -1.23 | 1.59       | 1.69  | 2.35  | 2.06  | 1.89  | 1.62  | 1.81  | 1.93 | 1.97  | 1.61  | 1.91 | 1.58 |
| P53_SIGNALLING                     | -1.17        | 1.97        | -1.33     | -1.26 | -1.01 | -1.29 | -1.14 | -0.92 | -1.23 | -1.25 | -1.06 | 1.83       | 1.72  | 1.98  | 2.34  | 2.23  | 2.11  | 2.19  | 1.97 | 2.00  | 1.71  | 1.68 | 1.85 |
| pparaPathway                       | -1.17        | 1.92        | -1.21     | -1.55 | -1.06 | -1.62 | -0.95 | -0.99 | -1.23 | -1.10 | -0.85 | 1.73       | 2.12  | 1.79  | 2.07  | 2.07  | 2.09  | 1.82  | 2.07 | 1.67  | 2.07  | 1.82 | 1.77 |

| NAME                           | Ave Preg NES | Ave Inv NES | Lactation |       |       |       |       |       |       |       |       | Involution |      |       |       |      |      |       |      |      |       |      |      |
|--------------------------------|--------------|-------------|-----------|-------|-------|-------|-------|-------|-------|-------|-------|------------|------|-------|-------|------|------|-------|------|------|-------|------|------|
|                                |              |             | Day 1     |       |       | Day 3 |       |       | Day 7 |       |       | Day 1      |      |       | Day 2 |      |      | Day 3 |      |      | Day 4 |      |      |
|                                |              |             | A         | B     | C     | A     | B     | C     | A     | B     | C     | A          | B    | C     | A     | B    | C    | A     | B    | C    | A     | B    | C    |
| BRENTANI_IMMUNE_FUNCTION       | -1.18        | 1.77        | -1.34     | -1.03 | -1.30 | -1.32 | -1.21 | -1.06 | -1.23 | -1.18 | -0.91 | 1.44       | 1.36 | 1.22  | 2.15  | 2.15 | 1.76 | 1.89  | 2.08 | 1.81 | 1.69  | 1.84 | 1.84 |
| TGF_Beta_Signaling_Pathway     | -1.18        | 1.99        | -1.29     | -1.23 | -1.04 | -1.17 | -1.20 | -1.22 | -1.34 | -0.89 | -1.23 | 1.76       | 2.13 | 2.22  | 1.70  | 2.07 | 2.21 | 1.78  | 2.27 | 1.90 | 2.07  | 1.92 | 1.90 |
| TNFA_5ENDOTHELIAL_DOWN         | -1.18        | 1.85        | -1.22     | -0.97 | -1.55 | -1.26 | -1.41 | -1.00 | -1.02 | -1.08 | -1.10 | 2.17       | 1.79 | 2.02  | 2.03  | 2.28 | 1.69 | 1.75  | 1.83 | 1.87 | 1.58  | 1.51 | 1.71 |
| IL6_STROMA_UP_CROONQUIST       | -1.18        | 1.53        | -1.05     | -1.06 | -1.30 | -1.58 | -1.17 | -1.03 | -0.98 | -1.54 | -0.91 | 1.31       | 1.17 | 1.50  | 1.50  | 1.81 | 1.61 | 1.70  | 1.74 | 1.59 | 1.52  | 1.38 | 1.49 |
| NFKB_UP_HINATA                 | -1.20        | 1.65        | -1.39     | -1.09 | -1.04 | -1.50 | -1.31 | -1.29 | -1.00 | -1.00 | -1.14 | 1.59       | 1.59 | 2.11  | 1.81  | 1.70 | 0.00 | 1.74  | 2.20 | 1.95 | 1.85  | 1.61 | 1.62 |
| raccycdPathway                 | -1.20        | 2.16        | -1.04     | -1.05 | -1.24 | -1.64 | -1.10 | -0.93 | -1.10 | -1.10 | -1.55 | 2.09       | 2.08 | 2.07  | 2.49  | 2.23 | 2.17 | 2.16  | 2.23 | 2.06 | 2.05  | 2.46 | 1.79 |
| PASSERINI_INFLAMMATION         | -1.21        | 1.74        | -1.22     | -1.37 | -1.41 | -1.36 | -1.18 | -1.46 | -0.94 | -1.10 | -0.84 | 1.77       | 1.52 | 2.33  | 1.84  | 1.69 | 1.64 | 1.52  | 1.98 | 1.85 | 1.54  | 1.61 | 1.62 |
| pdgfPathway                    | -1.21        | 2.02        | -1.21     | -1.42 | -1.41 | -1.58 | -0.78 | -1.33 | -1.18 | -1.22 | -0.81 | 1.84       | 2.21 | 2.30  | 2.57  | 2.29 | 1.63 | 2.07  | 2.04 | 1.37 | 2.47  | 1.66 | 1.85 |
| 41bbPathway                    | -1.22        | 1.67        | -1.00     | -1.18 | -1.18 | -1.33 | -1.29 | -1.32 | -1.37 | -0.85 | -1.42 | 1.66       | 1.36 | 1.71  | 2.46  | 1.45 | 1.72 | 1.35  | 1.88 | 1.31 | 1.68  | 1.83 | 1.62 |
| Fatty_Acid_Degradation         | -1.22        | 1.89        | -1.55     | -0.96 | -1.61 | -1.28 | -0.98 | -1.03 | -1.30 | -1.13 | -1.16 | 1.76       | 2.30 | 1.85  | 1.73  | 1.86 | 2.09 | 1.86  | 1.90 | 1.88 | 1.77  | 1.85 | 1.87 |
| tollPathway                    | -1.22        | 1.80        | -1.31     | -1.32 | -1.27 | -1.30 | -1.48 | -1.18 | -1.06 | -0.93 | -1.16 | 1.59       | 1.33 | 1.61  | 1.92  | 2.18 | 1.71 | 1.69  | 2.00 | 2.00 | 1.74  | 1.71 | 2.11 |
| Proteasome_Degradation         | -1.23        | 1.53        | -1.06     | -1.64 | -0.92 | -1.48 | -1.24 | -1.07 | -1.40 | -1.15 | -1.08 | 1.75       | 1.68 | 1.60  | 1.87  | 1.56 | 2.01 | 1.42  | 2.10 | 1.91 | -0.81 | 1.58 | 1.75 |
| IFNB_HT1080_UP                 | -1.23        | 2.01        | -1.44     | -1.19 | -1.26 | -1.28 | -1.22 | -1.16 | -1.19 | -1.31 | -1.02 | 1.89       | 2.02 | 1.77  | 2.00  | 1.90 | 2.17 | 2.12  | 2.25 | 2.35 | 1.95  | 1.70 | 2.05 |
| hivnefPathway                  | -1.23        | 1.75        | -1.44     | -1.37 | -1.16 | -1.17 | -1.50 | -1.04 | -1.40 | -0.87 | -1.14 | 1.76       | 1.86 | 1.53  | 1.60  | 1.96 | 1.91 | 1.73  | 1.68 | 1.72 | 2.09  | 1.64 | 1.55 |
| keratinocytePathway            | -1.24        | 1.84        | -1.43     | -1.40 | -1.01 | -1.55 | -1.04 | -1.15 | -1.39 | -0.91 | -1.25 | 1.55       | 1.91 | 1.72  | 2.19  | 2.09 | 1.68 | 1.98  | 1.88 | 2.06 | 1.98  | 1.51 | 1.56 |
| ccr5Pathway                    | -1.24        | 1.77        | -1.47     | -1.38 | -1.20 | -1.46 | -0.31 | -1.53 | -1.07 | -1.40 | -1.36 | 1.71       | 1.63 | 1.87  | 2.05  | 2.27 | 1.42 | 1.93  | 1.86 | 1.99 | 1.59  | 1.35 | 1.55 |
| MOUSE_DENA_UP                  | -1.25        | 1.78        | -1.41     | -1.17 | -1.22 | -1.41 | -0.98 | -1.35 | -1.14 | -1.29 | -1.25 | 1.68       | 1.40 | 1.31  | 1.75  | 2.04 | 3.44 | 1.61  | 1.96 | 1.94 | 1.43  | 1.29 | 1.50 |
| EMT_DOWN_JECHLINGER            | -1.25        | 2.03        | -1.29     | -1.58 | -1.20 | -1.46 | -1.41 | -1.27 | -1.05 | -1.11 | -0.85 | 1.57       | 2.00 | 2.05  | 3.02  | 1.91 | 2.03 | 1.86  | 1.89 | 2.36 | 2.20  | 1.75 | 1.75 |
| metPathway                     | -1.25        | 1.89        | -1.21     | -1.26 | -1.44 | -1.07 | -1.05 | -1.41 | -1.32 | -1.48 | -1.01 | 1.83       | 2.12 | 1.84  | 2.04  | 2.20 | 2.02 | 2.00  | 1.76 | 1.46 | 2.12  | 1.84 | 1.49 |
| TARTE_BCELL                    | -1.25        | 2.00        | -1.18     | -1.10 | -1.30 | -1.32 | -1.31 | -1.48 | -0.91 | -1.51 | -1.14 | 1.45       | 1.97 | 1.81  | 2.60  | 1.87 | 2.47 | 1.91  | 2.46 | 2.58 | 1.35  | 1.70 | 1.85 |
| mapkPathway                    | -1.26        | 1.89        | -1.41     | -1.14 | -1.27 | -1.22 | -0.95 | -1.50 | -1.21 | -1.14 | -1.47 | 1.86       | 2.01 | 1.72  | 2.24  | 1.69 | 1.96 | 1.88  | 1.82 | 2.00 | 1.89  | 1.67 | 1.98 |
| ceramidePathway                | -1.26        | 1.92        | -1.07     | -1.30 | -1.27 | -1.78 | -1.40 | -0.99 | -1.39 | -0.93 | -1.25 | 1.60       | 1.93 | 1.61  | 2.30  | 2.55 | 1.79 | 1.46  | 2.47 | 2.12 | 1.81  | 1.43 | 1.94 |
| p53hypoxiaPathway              | -1.28        | 2.12        | -1.37     | -0.89 | -1.33 | -1.32 | -1.10 | -1.26 | -1.72 | -1.21 | -1.28 | 2.20       | 2.09 | 2.13  | 2.26  | 2.64 | 2.20 | 1.86  | 2.15 | 1.50 | 2.00  | 2.17 | 2.18 |
| calcineurinPathway             | -1.28        | 1.90        | -1.51     | -1.70 | -1.55 | -1.62 | -0.16 | -1.06 | -1.39 | -1.29 | -1.25 | 1.86       | 1.28 | 2.23  | 1.98  | 1.98 | 1.75 | 2.30  | 2.23 | 1.90 | 1.78  | 1.67 | 1.82 |
| ICHIBA_GVHD                    | -1.29        | 1.46        | -1.25     | -1.35 | -1.03 | -1.48 | -1.37 | -1.20 | -1.51 | -1.15 | -1.24 | 1.46       | 1.57 | 1.52  | 1.71  | 1.44 | 1.88 | 1.73  | 0.00 | 1.55 | 1.47  | 1.56 | 1.66 |
| CBF_MYH_ROSS                   | -1.29        | 1.70        | -1.03     | -1.67 | -1.20 | -1.53 | -1.25 | -1.15 | -1.00 | -1.20 | -1.55 | 1.84       | 1.31 | -0.88 | 1.63  | 2.16 | 2.68 | 1.89  | 2.24 | 2.86 | 1.65  | 1.47 | 1.52 |
| CELL_MOTILITY                  | -1.30        | 1.93        | -1.35     | -1.40 | -1.47 | -1.15 | -1.19 | -1.16 | -1.57 | -1.25 | -1.15 | 2.17       | 1.95 | 1.91  | 1.93  | 2.21 | 2.02 | 1.73  | 2.04 | 2.07 | 1.89  | 1.53 | 1.67 |
| rasPathway                     | -1.31        | 1.95        | -1.21     | -1.24 | -0.99 | -1.17 | -1.55 | -1.27 | -1.15 | -1.58 | -1.66 | 2.25       | 1.65 | 1.70  | 2.04  | 2.12 | 1.80 | 1.30  | 2.30 | 2.09 | 1.89  | 2.08 | 2.15 |
| BRENTANI_TRANSCRIPTION_FACTORS | -1.32        | 2.11        | -1.39     | -1.26 | -1.52 | -1.44 | -1.36 | -1.26 | -0.97 | -1.50 | -1.14 | 1.72       | 1.74 | 2.07  | 2.20  | 2.28 | 2.09 | 2.13  | 2.32 | 2.21 | 2.32  | 2.09 | 2.14 |
| EPITHELIAL_DOWN_ZUCCHI         | -1.33        | 1.80        | -1.28     | -1.46 | -1.48 | -1.37 | -1.14 | -1.34 | -1.22 | -1.29 | -1.42 | 1.65       | 1.64 | 1.53  | 2.35  | 1.95 | 2.04 | 1.56  | 1.84 | 2.11 | 1.59  | 1.67 | 1.60 |
| il6Pathway                     | -1.34        | 1.93        | -1.59     | -1.51 | -1.42 | -1.57 | -1.13 | -1.42 | -0.77 | -1.44 | -1.24 | 1.57       | 1.74 | 2.08  | 2.22  | 1.99 | 1.87 | 2.04  | 1.92 | 1.88 | 1.88  | 2.04 | 1.88 |
| p38mapkPathway                 | -1.35        | 1.80        | -1.41     | -1.31 | -1.21 | -1.56 | -1.14 | -1.70 | -1.10 | -1.22 | -1.53 | 1.76       | 2.25 | 1.77  | 2.06  | 1.46 | 1.87 | 1.69  | 1.96 | 1.55 | 1.63  | 1.84 | 1.75 |
| MGUS_MM_DAVIES                 | -1.37        | 1.85        | -1.32     | -1.82 | -1.45 | -1.62 | -1.25 | -1.25 | -0.99 | -1.45 | -1.21 | 1.82       | 1.54 | 1.63  | 2.24  | 2.09 | 1.85 | 1.93  | 2.04 | 1.88 | 2.01  | 1.71 | 1.43 |
| P53_UP_KANNAN                  | -1.39        | 2.06        | -1.29     | -1.52 | -1.31 | -1.28 | -1.35 | -1.62 | -1.56 | -1.18 | -1.37 | 2.16       | 1.70 | 2.37  | 2.38  | 2.29 | 2.32 | 1.96  | 2.15 | 2.19 | 1.71  | 1.64 | 1.83 |
| hcmvPathway                    | -1.40        | 2.04        | -1.54     | -1.68 | -1.54 | -1.17 | -1.49 | -1.23 | -1.41 | -1.13 | -1.41 | 2.07       | 2.11 | 1.73  | 2.33  | 2.58 | 1.95 | 2.11  | 2.11 | 2.12 | 1.95  | 1.67 | 1.79 |
| cxcr4Pathway                   | -1.41        | 1.89        | -1.23     | -1.69 | -1.50 | -1.51 | -1.50 | -1.12 | -1.35 | -1.58 | -1.21 | 2.01       | 2.28 | 2.11  | 2.37  | 2.03 | 1.97 | 1.74  | 2.12 | 1.72 | 1.55  | 1.42 | 1.39 |
| KRAS_TOP100_KNOCKDOWN_CORDERO  | -1.42        | 1.99        | -1.38     | -1.25 | -1.23 | -1.69 | -1.17 | -1.31 | -1.74 | -1.73 | -1.25 | 1.79       | 2.02 | 1.82  | 2.35  | 2.20 | 2.03 | 1.86  | 2.30 | 2.15 | 1.84  | 1.74 | 1.78 |
| stressPathway                  | -1.42        | 1.95        | -1.56     | -1.38 | -1.28 | -1.77 | -1.47 | -1.76 | -1.27 | -0.94 | -1.39 | 1.77       | 1.76 | 1.65  | 2.11  | 2.18 | 1.74 | 1.75  | 2.36 | 2.26 | 2.10  | 1.56 | 2.21 |
| RADIATION_SENSITIVITY          | -1.46        | 2.28        | -1.97     | -1.28 | -1.32 | -1.47 | -1.17 | -1.41 | -1.86 | -1.51 | -1.16 | 2.50       | 2.53 | 2.27  | 2.28  | 2.43 | 2.31 | 2.16  | 2.31 | 2.18 | 2.10  | 1.87 | 2.37 |
| PASSERINI_APOPTOSIS            | -1.49        | 2.19        | -1.48     | -1.32 | -1.35 | -1.90 | -1.71 | -1.61 | -1.60 | -0.87 | -1.57 | 2.37       | 2.21 | 2.19  | 2.68  | 2.18 | 2.35 | 2.33  | 2.43 | 2.21 | 1.92  | 1.61 | 1.80 |
