# Supplementary material
Source: PubMed Central journal article supplement (PMC3615553)
Supplement: NIHMS449134-supplement-Table_S3.pdf [file NIHMS449134-supplement-Table_S3.pdf]

**Supplementary Table 3****Normalized Enrichment Scores from ASSESS for the Puberty Dataset**

| NAME                                       | Ave early NES | Ave late NES | 3 week |      |      | 4 week |      |      | 5 week |       |       | 6 week |       |       | 7 week |       |   |
|--------------------------------------------|---------------|--------------|--------|------|------|--------|------|------|--------|-------|-------|--------|-------|-------|--------|-------|---|
|                                            |               |              | A      | B    | C    | A      | B    | C    | A      | B     | C     | A      | B     | C     | A      | B     | C |
| Valine, leucine and isoleucine degradation | 1.96          | -1.98        | 1.91   | 2.06 | 1.91 | 1.67   | 2.12 | 2.07 | -2.07  | -1.96 | -1.78 | -2.02  | -1.81 | -2.15 | -1.96  | -2.05 |   |
| Krebs_TCA_Cycle                            | 1.91          | -1.83        | 1.79   | 2.05 | 1.99 | 2.16   | 1.73 | 1.77 | -1.94  | -1.59 | -1.61 | -1.72  | -1.95 | -2.03 | -1.71  | -2.09 |   |
| KREBS_TCA_CYCLE                            | 1.90          | -1.85        | 1.77   | 2.07 | 2.01 | 2.14   | 1.62 | 1.77 | -1.99  | -1.61 | -1.64 | -1.77  | -1.90 | -2.12 | -1.69  | -2.06 |   |
| Propanoate metabolism                      | 1.88          | -1.90        | 1.80   | 2.08 | 1.96 | 1.49   | 2.05 | 1.93 | -2.04  | -2.01 | -1.52 | -2.04  | -1.80 | -2.04 | -1.86  | -1.87 |   |
| ELECTRON_TRANSPORT_CHAIN                   | 1.87          | -1.99        | 1.79   | 1.67 | 1.68 | 2.11   | 2.01 | 1.95 | -1.95  | -2.12 | -1.80 | -2.03  | -1.98 | -2.00 | -1.87  | -2.15 |   |
| Electron_Transport_Chain                   | 1.86          | -1.98        | 1.81   | 1.64 | 1.66 | 2.03   | 2.02 | 2.01 | -1.96  | -2.07 | -1.82 | -2.03  | -2.01 | -2.03 | -1.85  | -2.10 |   |
| VOXPPOS                                    | 1.84          | -2.00        | 1.83   | 1.85 | 1.63 | 2.11   | 1.87 | 1.79 | -2.05  | -2.02 | -1.81 | -2.02  | -2.14 | -2.00 | -1.92  | -2.08 |   |
| Fatty acid metabolism                      | 1.84          | -1.83        | 1.73   | 1.81 | 1.89 | 1.67   | 1.98 | 1.94 | -1.83  | -1.77 | -1.50 | -1.69  | -2.12 | -1.98 | -1.85  | -1.92 |   |
| FATTY_ACID_DEGRADATION                     | 1.83          | -1.61        | 1.69   | 1.57 | 1.88 | 1.88   | 1.94 | 2.04 | -1.74  | -1.34 | -1.51 | -1.66  | -1.51 | -1.71 | -1.75  | -1.69 |   |
| Oxidative phosphorylation                  | 1.82          | -1.94        | 1.86   | 1.70 | 1.88 | 1.85   | 1.92 | 1.74 | -2.01  | -2.04 | -1.88 | -1.75  | -1.69 | -2.03 | -2.02  | -2.09 |   |
| Citrate cycle (TCA cycle)                  | 1.79          | -1.62        | 1.40   | 1.79 | 1.83 | 1.86   | 1.77 | 2.10 | -1.61  | -1.46 | -1.46 | -1.54  | -1.82 | -1.84 | -1.65  | -1.59 |   |
| Mitochondrial_fatty_acid_betaoxidation     | 1.76          | -1.73        | 1.54   | 1.64 | 1.55 | 1.94   | 2.05 | 1.82 | -1.92  | -1.58 | -1.62 | -1.70  | -1.57 | -1.86 | -1.70  | -1.91 |   |
| Fatty_Acid_Degradation                     | 1.73          | -1.61        | 1.65   | 1.60 | 1.65 | 1.80   | 1.81 | 1.86 | -1.79  | -1.40 | -1.46 | -1.69  | -1.45 | -1.81 | -1.75  | -1.50 |   |
| MYC_293_UP                                 | 1.69          | -1.70        | 1.76   | 1.48 | 1.69 | 1.89   | 1.71 | 1.59 | -1.28  | -1.68 | -1.54 | -2.01  | -1.94 | -1.85 | -1.68  | -1.63 |   |
| PANCREAS_CHR18_AGUIRRE                     | 1.65          | -1.32        | 0.91   | 2.04 | 1.53 | 1.89   | 1.74 | 1.78 | -1.22  | -1.20 | -1.72 | -1.12  | -1.42 | -1.14 | -1.10  | -1.64 |   |
| Bile acid biosynthesis                     | 1.65          | -1.63        | 1.04   | 1.79 | 1.57 | 1.47   | 2.05 | 1.96 | -1.49  | -1.76 | -1.63 | -1.53  | -1.66 | -1.85 | -1.54  | -1.58 |   |
| TCA                                        | 1.63          | -1.63        | 1.47   | 1.52 | 1.72 | 1.74   | 1.63 | 1.71 | -1.70  | -1.52 | -1.43 | -1.66  | -1.38 | -1.79 | -1.74  | -1.86 |   |
| Porphyrin and chlorophyll metabolism       | 1.59          | -1.23        | 1.26   | 1.57 | 1.60 | 1.89   | 1.52 | 1.68 | -1.76  | 0.90  | -1.67 | -1.59  | -1.37 | -1.41 | -1.49  | -1.43 |   |
| RAPAMYCIN_DOWN_PENG                        | 1.57          | -1.50        | 1.40   | 1.57 | 1.68 | 1.57   | 1.69 | 1.53 | -1.51  | -1.41 | -1.58 | -1.56  | -1.42 | -1.57 | -1.50  | -1.42 |   |
| FATTY_ACID_METABOLISM                      | 1.54          | -1.64        | 1.18   | 1.34 | 1.82 | 1.59   | 1.66 | 1.67 | -1.85  | -1.84 | -1.52 | -1.82  | -1.34 | -1.96 | -1.49  | -1.31 |   |
| MYC_P493_TET_UP                            | 1.54          | -1.53        | 1.74   | 1.46 | 1.45 | 1.67   | 1.47 | 1.46 | -1.43  | -1.55 | -1.54 | -1.59  | -1.41 | -1.48 | -1.61  | -1.61 |   |
| ELECTRON_TRANSPORTER_ACTIVITY              | 1.52          | -1.53        | 1.45   | 1.37 | 1.70 | 1.40   | 1.68 | 1.53 | -1.84  | -1.36 | -1.37 | -1.42  | -1.31 | -1.53 | -1.65  | -1.74 |   |
| Butanoate metabolism                       | 1.47          | -1.80        | 1.63   | 1.05 | 1.42 | 1.42   | 1.50 | 1.79 | -2.13  | -1.78 | -1.37 | -1.79  | -1.78 | -1.67 | -1.99  | -1.89 |   |
| Pyruvate metabolism                        | 1.45          | -1.61        | 1.56   | 1.13 | 1.60 | 1.34   | 1.49 | 1.61 | -1.69  | -1.60 | -1.54 | -1.97  | -1.23 | -1.69 | -1.79  | -1.40 |   |
| MOUSE_MYC_E2F1_DOWN                        | 1.45          | -1.48        | 1.50   | 1.68 | 1.40 | 1.58   | 1.14 | 1.40 | -1.40  | -1.50 | -1.39 | -1.80  | -1.77 | -1.16 | -1.52  | -1.32 |   |
| ceramidePathway                            | 1.45          | -1.47        | 1.06   | 1.64 | 1.60 | 1.62   | 1.43 | 1.34 | -1.55  | -1.27 | -1.79 | -1.22  | -1.49 | -1.52 | -1.62  | -1.29 |   |
| mitochondriaPathway                        | 1.42          | -1.38        | 1.22   | 1.70 | 1.48 | 1.31   | 1.40 | 1.42 | -1.37  | -1.60 | -1.57 | -1.14  | -1.13 | -1.64 | -1.23  | -1.34 |   |
| chemicalPathway                            | 1.42          | -1.18        | 1.33   | 1.91 | 1.29 | 1.27   | 1.55 | 1.15 | -1.04  | -1.58 | -0.88 | -1.14  | -1.05 | -1.26 | -1.29  | -1.17 |   |
| MOUSE_MYC_TGFA_DOWN                        | 1.40          | -1.48        | 1.49   | 1.55 | 1.32 | 1.55   | 1.26 | 1.25 | -1.45  | -1.48 | -1.42 | -1.62  | -1.76 | -1.29 | -1.47  | -1.34 |   |
| PANCREAS_CHR22_AGUIRRE                     | 1.39          | -1.35        | 1.64   | 0.98 | 1.39 | 1.49   | 1.44 | 1.40 | -1.24  | -1.54 | -1.10 | -1.32  | -1.75 | -1.37 | -1.18  | -1.33 |   |
| MYC_DATABASE_UP                            | 1.36          | -0.24        | 1.41   | 1.53 | 1.56 | 1.32   | 1.39 | 0.95 | 1.44   | 1.22  | -1.01 | 1.26   | -1.03 | -1.24 | -1.27  | -1.29 |   |
| MOUSE_DENA_DOWN                            | 1.36          | -1.29        | 1.47   | 1.65 | 1.31 | 1.43   | 1.04 | 1.24 | -1.09  | -1.39 | -0.91 | -1.22  | -1.68 | -1.23 | -1.60  | -1.22 |   |
| Purine metabolism                          | 1.34          | 0.20         | 1.35   | 1.03 | 1.60 | 1.34   | 1.29 | 1.44 | -1.31  | -1.45 | 1.11  | 1.08   | 1.14  | -1.28 | 1.31   | 1.03  |   |
| MOUSE_E2F1_DOWN                            | 1.32          | -1.04        | 1.33   | 1.39 | 1.41 | 1.55   | 1.04 | 1.18 | -1.15  | -1.13 | 1.01  | -1.77  | -1.70 | -1.09 | -1.29  | -1.21 |   |
| GATA1_WELCH                                | 1.32          | -0.59        | 1.38   | 1.37 | 1.43 | 1.17   | 1.25 | 1.29 | -1.35  | -1.39 | 1.01  | -1.42  | -1.74 | -1.55 | 0.84   | 0.90  |   |
| IFNG_HT1080_UP                             | 1.31          | -0.67        | 0.93   | 1.37 | 1.22 | 1.48   | 1.57 | 1.31 | 1.16   | -1.36 | -1.39 | -1.20  | 1.07  | -1.20 | -1.34  | -1.12 |   |
| G2_GR_G3                                   | 1.31          | -1.36        | 1.64   | 1.45 | 1.16 | 1.49   | 0.87 | 1.26 | -1.06  | -1.10 | -1.38 | -1.26  | -1.37 | -1.45 | -1.62  | -1.59 |   |
| Lysine degradation                         | 1.31          | -0.81        | 1.52   | 0.99 | 1.53 | 1.31   | 1.03 | 1.47 | -1.28  | 1.09  | 0.80  | -1.50  | -1.34 | -1.19 | -1.73  | -1.29 |   |
| SURVIVAL_ALL_GOOD                          | 1.27          | -1.00        | 1.51   | 1.19 | 1.20 | 1.25   | 1.03 | 1.41 | -1.36  | -1.10 | 1.19  | -1.36  | -1.36 | -1.27 | -1.30  | -1.44 |   |
| TARTE_PLASMA_BLASTIC                       | 1.26          | -0.72        | 1.28   | 1.15 | 1.39 | 1.22   | 1.37 | 1.18 | 1.02   | -1.19 | -1.40 | -1.24  | 0.97  | -1.26 | -1.43  | -1.21 |   |
| deathPathway                               | 1.26          | -1.25        | 1.07   | 1.27 | 1.38 | 1.41   | 1.34 | 1.10 | -1.27  | -1.28 | -1.28 | -1.06  | -1.28 | -1.49 | -1.33  | -1.03 |   |
| Glycine, serine and threonine metabolism   | 1.25          | -1.01        | 1.01   | 1.37 | 1.28 | 1.17   | 1.25 | 1.45 | -1.48  | -1.38 | -1.28 | -1.15  | -1.23 | 1.01  | -1.19  | -1.38 |   |
| FETAL_LIVER_VS_ADULT_LIVER_GNF2            | 1.23          | -0.72        | 1.45   | 1.13 | 1.06 | 1.09   | 1.14 | 1.49 | -1.50  | -1.27 | -1.12 | -1.59  | -1.41 | 0.89  | 1.24   | -0.98 |   |

| NAME                                 | Ave early NES | Ave late NES | 3 week |       |       | 4 week |       |       | 5 week |       | 6 week |       |       | 7 week |       |       |
|--------------------------------------|---------------|--------------|--------|-------|-------|--------|-------|-------|--------|-------|--------|-------|-------|--------|-------|-------|
|                                      |               |              | A      | B     | C     | A      | B     | C     | A      | B     | A      | B     | C     | A      | B     | C     |
| biopeptidesPathway                   | 1.21          | -0.07        | 1.60   | 1.17  | 0.81  | 1.21   | 1.03  | 1.43  | -1.00  | -1.30 | -0.97  | 1.07  | -1.21 | 1.17   | 0.99  | 0.67  |
| ANTI_CD44_UP_HOGERKORP               | 1.20          | -1.29        | 0.91   | 1.12  | 1.40  | 1.02   | 1.46  | 1.28  | -0.94  | -1.53 | -1.51  | -1.03 | -1.30 | -1.27  | -1.19 | -1.51 |
| no1Pathway                           | 1.19          | -0.73        | 1.51   | 1.22  | 1.01  | 1.22   | 1.40  | 0.77  | -1.00  | -1.23 | -1.45  | -1.22 | 0.93  | -1.25  | 0.70  | -1.29 |
| nfatPathway                          | 1.18          | -0.58        | 1.41   | 1.35  | 0.98  | 0.92   | 0.95  | 1.46  | -0.95  | -1.24 | -1.24  | -1.00 | -1.01 | 1.01   | 0.77  | -0.98 |
| BCL2_FAMILY_AND_REG_NETWORK          | 1.18          | -0.33        | 1.03   | 1.52  | 1.21  | 1.27   | 1.03  | 1.03  | -0.92  | -1.52 | -1.30  | -1.34 | -0.92 | 1.00   | 1.19  | 1.19  |
| TH_UP_KIM                            | 1.17          | -0.42        | 1.10   | 1.18  | 0.90  | 1.38   | 1.11  | 1.32  | -1.12  | -1.52 | 1.03   | -1.06 | -1.48 | 0.96   | 1.18  | -1.37 |
| Statin_Pathway_PharmGKB              | 1.14          | -0.94        | 1.12   | 1.02  | 1.43  | 0.99   | 0.92  | 1.39  | -1.30  | -0.92 | -1.14  | -1.39 | -1.07 | -1.21  | -1.54 | 1.02  |
| MOUSE_MYC_DOWN                       | 1.13          | -0.57        | 1.01   | 0.97  | 1.05  | 1.06   | 1.07  | 1.64  | -1.56  | -1.42 | 0.89   | -1.37 | -1.38 | 0.92   | 0.81  | -1.41 |
| ST_ERK1_ERK2_MAPK_PATHWAY            | 1.12          | -0.96        | 0.98   | 1.21  | 1.14  | 1.49   | 0.98  | 0.95  | -1.15  | -1.08 | 0.97   | -0.81 | -1.48 | -1.09  | -1.74 | -1.26 |
| beta_Alanine metabolism              | 1.09          | -1.24        | -0.78  | 1.65  | 1.44  | 1.18   | 1.38  | 1.66  | -1.92  | -1.55 | 0.67   | -1.66 | -1.40 | -1.34  | -1.46 | -1.24 |
| crebPathway                          | 1.08          | -0.31        | 1.31   | 1.43  | 0.94  | 0.92   | 0.90  | 0.98  | 0.90   | -1.45 | -0.94  | -0.82 | -1.11 | 1.20   | 0.93  | -1.19 |
| ZHAN_TONSIL_BONEMARROW               | 1.04          | -0.94        | 1.85   | -1.17 | 1.26  | 1.29   | 1.54  | 1.47  | -1.33  | -1.14 | 0.94   | -1.31 | -1.17 | -1.28  | -1.19 | -1.03 |
| ST_P38_MAPK_PATHWAY                  | 1.04          | -0.65        | 0.89   | 1.29  | 1.02  | 1.14   | 0.96  | 0.93  | 0.78   | -1.51 | -0.91  | -1.00 | -1.46 | 1.10   | -0.83 | -1.35 |
| PML_RAR_ROSS                         | 0.90          | 0.25         | 1.33   | -1.09 | 1.28  | 1.18   | 1.53  | 1.19  | 1.09   | -1.16 | 1.31   | 0.96  | -1.00 | -1.44  | 1.21  | 1.01  |
| chrebpPathway                        | 0.86          | -1.03        | 1.23   | 1.51  | -0.87 | 1.21   | 1.01  | 1.06  | -1.11  | -1.32 | -1.42  | -0.97 | 0.97  | -1.39  | -1.55 | -1.44 |
| Alanine and aspartate metabolism     | 0.84          | -0.60        | 1.32   | 1.00  | 1.22  | 1.18   | -0.80 | 1.13  | -1.51  | -1.12 | -1.40  | 1.32  | -0.90 | 0.86   | -0.92 | -1.09 |
| MYC_HUVEC_SAGE_ARRAY_UP              | 0.80          | -0.24        | 1.03   | 1.44  | 0.90  | 1.18   | 1.37  | -1.11 | -0.99  | 1.02  | 1.09   | 1.54  | -1.29 | -1.08  | -1.16 | -1.08 |
| il1rPathway                          | 0.73          | -0.09        | 1.09   | -0.94 | 0.80  | 1.54   | 0.90  | 1.02  | -1.06  | 0.98  | -1.43  | 1.18  | -1.44 | 0.95   | -0.97 | 1.04  |
| CHEN_LUNG_SURVIVAL                   | 0.70          | -1.18        | 1.78   | -1.32 | 1.43  | -1.11  | 1.69  | 1.75  | -1.69  | -1.26 | -1.23  | -1.82 | -1.32 | -1.70  | -1.37 | 0.96  |
| ck1Pathway                           | 0.68          | 0.03         | 0.84   | 1.38  | -0.88 | 1.02   | 0.84  | 0.86  | 0.85   | -1.23 | -0.84  | 1.42  | 1.23  | -0.86  | 1.13  | -1.50 |
| HCV_HCC_MARKER                       | 0.66          | -0.24        | 1.24   | 0.76  | 1.34  | -0.89  | 0.68  | 0.84  | -1.12  | -0.81 | -1.52  | 0.70  | -1.46 | 1.04   | 0.62  | 0.59  |
| Hypertrophy_model                    | 0.65          | 0.71         | -0.82  | 0.70  | 0.95  | 1.18   | 0.98  | 0.92  | -1.11  | 1.44  | 0.91   | 1.25  | 1.30  | 1.29   | -1.01 | 1.59  |
| PASSERINI_TRANSCRIPTION              | 0.64          | 0.06         | 1.22   | 0.99  | -1.49 | 1.04   | 0.96  | 1.11  | -0.99  | -1.18 | 1.28   | -1.17 | -1.22 | 1.29   | 1.06  | 1.40  |
| pdgfPathway                          | 0.43          | 0.16         | 1.11   | 1.15  | -1.00 | 1.24   | 1.12  | -1.05 | 0.97   | -1.47 | 1.24   | 1.20  | -1.42 | 0.95   | -1.07 | 0.88  |
| PARK_MSC_MPP                         | 0.42          | 0.02         | -1.23  | 1.02  | 1.42  | -1.15  | 1.19  | 1.27  | -1.25  | -1.09 | 1.50   | 1.29  | 1.23  | 1.06   | -1.51 | -1.04 |
| CRASH_AND_BURN_MUT_SHEPARD           | 0.37          | 0.23         | 1.17   | 1.10  | -1.17 | 1.17   | -1.14 | 1.09  | -1.40  | -1.28 | 1.24   | 1.31  | -1.41 | 1.10   | 1.28  | 1.00  |
| ST_PHOSPHOINOSITIDE_3_KINASE_PATHWAY | 0.36          | 0.23         | -1.14  | 1.19  | 1.24  | 1.47   | 0.82  | -1.45 | 0.99   | -1.11 | 1.01   | -1.04 | -1.20 | 1.02   | 1.03  | 1.11  |
| COPD_DOWN_NING                       | 0.32          | 1.27         | -1.24  | 1.10  | 1.13  | 1.02   | -1.16 | 1.05  | 1.44   | 1.15  | 1.11   | 1.26  | 1.20  | 1.29   | 1.40  | 1.31  |
| ngfPathway                           | 0.32          | -0.40        | 0.89   | -0.98 | -0.96 | 1.15   | 0.84  | 0.96  | 0.97   | -1.08 | -0.94  | -0.96 | -1.50 | 0.89   | -1.43 | 0.82  |
| CBF_LEUKEMIA_ROSS                    | 0.32          | 0.33         | 1.00   | 0.91  | -1.10 | 0.96   | -1.05 | 1.18  | 1.25   | 1.37  | 1.43   | -1.18 | 1.30  | 1.15   | -1.47 | -1.16 |
| IFNA_HEPATO_UP                       | 0.24          | 0.42         | 1.00   | 1.01  | -1.07 | -1.33  | 0.94  | 0.87  | 1.07   | -1.00 | 1.51   | 1.09  | -1.02 | 1.04   | -0.84 | 1.49  |
| Aminoacyl_tRNA biosynthesis          | -0.05         | 0.04         | -1.15  | -1.30 | -0.92 | 1.04   | 1.01  | 1.01  | -1.42  | 1.69  | 1.02   | 1.04  | -0.93 | -0.86  | 1.01  | -1.24 |
| Glutathione metabolism               | -0.10         | 0.64         | -0.83  | -1.19 | 0.89  | 1.00   | -1.34 | 0.87  | 1.01   | -1.19 | 1.46   | 0.68  | 1.57  | -1.10  | 1.26  | 1.43  |
| cardiacegfPathway                    | -0.12         | 1.08         | 1.20   | -1.18 | -1.34 | 1.00   | -1.45 | 1.05  | 1.40   | 1.04  | 1.02   | 1.18  | 0.85  | 1.26   | 0.98  | 0.93  |
| TGF_BETA_SIGNALING_PATHWAY           | -0.16         | 1.35         | 1.00   | -1.17 | -1.47 | 1.03   | 1.03  | -1.37 | 1.50   | 1.24  | 1.52   | 1.59  | 1.14  | 1.16   | 1.56  | 1.10  |
| CELL_MOTILITY                        | -0.17         | 0.92         | 1.08   | -1.35 | -1.32 | 0.94   | -1.22 | 0.86  | 0.95   | 1.19  | -0.99  | 1.27  | 0.88  | 1.23   | 1.44  | 1.42  |
| mef2dPathway                         | -0.33         | 0.66         | -0.66  | 0.97  | -1.09 | -0.92  | -1.18 | 0.91  | 1.18   | -0.97 | 1.44   | 1.54  | 1.32  | 0.99   | 1.03  | -1.24 |
| IFNG_5ENDOTHELIAL_DOWN               | -0.41         | 1.32         | -0.95  | 1.14  | -1.24 | 1.14   | -1.14 | -1.39 | 1.45   | 1.36  | 1.31   | 1.55  | 1.21  | 1.21   | 1.14  | 1.32  |
| ndkDynaminPathway                    | -0.43         | 0.93         | -0.83  | -0.95 | 0.77  | -1.27  | -1.06 | 0.79  | 1.20   | 0.89  | 1.14   | 0.99  | 1.71  | 1.45   | 1.02  | -1.00 |
| EMT_UP_JEHLINGER                     | -0.44         | 0.96         | -1.12  | 1.05  | 1.05  | -1.21  | -1.34 | -1.07 | 1.33   | 1.31  | 1.55   | 1.41  | 1.20  | 0.96   | -1.17 | 1.08  |
| XINACTIVATED_GENES                   | -0.45         | 0.82         | 1.05   | -1.20 | -1.13 | -1.09  | -1.32 | 0.97  | 1.34   | -1.15 | 1.17   | -0.91 | 1.18  | 1.45   | 1.61  | 1.87  |
| BRCA_UP_WELCSH                       | -0.46         | 0.68         | 1.04   | -1.08 | -1.04 | -1.41  | 0.77  | -1.04 | 1.17   | -1.13 | 1.49   | -1.04 | 0.99  | 1.35   | 1.39  | 1.21  |
| IL5_UP_BYSTROM                       | -0.48         | 0.91         | -0.94  | -1.27 | 0.90  | -1.23  | -1.23 | 0.88  | 1.48   | 0.98  | -0.96  | 0.93  | 0.89  | 1.44   | 1.27  | 1.22  |
| TARTE_BCELL                          | -0.55         | 1.15         | 0.99   | -1.42 | -1.49 | 0.86   | -0.95 | -1.27 | 1.12   | 1.01  | 0.88   | 1.34  | 1.26  | 1.20   | 1.16  | 1.22  |
| WNT_SW480_UP                         | -0.55         | 1.49         | -1.24  | 0.79  | -1.04 | -1.33  | 0.82  | -1.32 | 1.56   | 1.32  | 1.96   | 1.29  | 0.99  | 1.63   | 1.74  | 1.43  |
| at1rPathway                          | -0.59         | 1.29         | 1.07   | -1.24 | -1.49 | -1.32  | -1.68 | 1.14  | 1.48   | 1.01  | 1.53   | 1.48  | 1.35  | 1.24   | 1.03  | 1.17  |

| NAME                                | Ave early NES | Ave late NES | 3 week |       |       | 4 week |       |       | 5 week |       | 6 week |       |       | 7 week |       |       |
|-------------------------------------|---------------|--------------|--------|-------|-------|--------|-------|-------|--------|-------|--------|-------|-------|--------|-------|-------|
|                                     |               |              | A      | B     | C     | A      | B     | C     | A      | B     | A      | B     | C     | A      | B     | C     |
| arenf2Pathway                       | -0.61         | 1.16         | 1.01   | -1.16 | -1.49 | 0.68   | -1.63 | -1.05 | 1.29   | 1.13  | 1.20   | 1.52  | 0.86  | 1.13   | 0.92  | 1.21  |
| Starch and sucrose metabolism       | -0.75         | 0.72         | -1.00  | -0.92 | -1.15 | 0.59   | -0.97 | -1.08 | -0.84  | -1.15 | 1.08   | 0.80  | 1.72  | 1.34   | 1.38  | 1.44  |
| ANDROGEN_UP_NELSON                  | -0.79         | 0.98         | 1.03   | -0.99 | -1.56 | -1.14  | -1.21 | -0.89 | 0.98   | 1.49  | 1.30   | 1.07  | 1.41  | 1.03   | -0.94 | 1.50  |
| Il12Pathway                         | -0.80         | 0.35         | -0.71  | -1.24 | -1.49 | 0.85   | -1.20 | -1.04 | -1.03  | 1.07  | -0.89  | 1.48  | -0.91 | 1.02   | 0.84  | 1.21  |
| Ubiquitin mediated proteolysis      | -0.81         | 1.08         | -1.36  | -1.27 | -1.20 | -1.01  | 1.05  | -1.10 | 1.56   | 1.01  | 1.25   | 1.52  | 1.04  | 1.66   | -1.22 | 1.79  |
| Photosynthesis                      | -0.83         | 0.82         | -1.02  | -1.15 | -1.54 | -1.02  | -1.20 | 0.97  | 0.87   | 1.10  | 1.13   | -1.02 | 1.19  | 1.16   | 0.75  | 1.41  |
| Flagellar assembly                  | -0.84         | 0.84         | -1.08  | -1.14 | -1.52 | -1.01  | -1.27 | 1.00  | 0.89   | 1.10  | 1.13   | -1.00 | 1.22  | 1.18   | 0.80  | 1.42  |
| ATP synthesis                       | -0.84         | 0.84         | -1.08  | -1.14 | -1.52 | -1.01  | -1.27 | 1.00  | 0.89   | 1.10  | 1.13   | -1.00 | 1.22  | 1.18   | 0.80  | 1.42  |
| Type III secretion system           | -0.84         | 0.84         | -1.08  | -1.14 | -1.52 | -1.01  | -1.27 | 1.00  | 0.89   | 1.10  | 1.13   | -1.00 | 1.22  | 1.18   | 0.80  | 1.42  |
| Calcium_regulation_in_cardiac_cells | -0.84         | 1.05         | -1.12  | -1.21 | -1.38 | 0.91   | -1.14 | -1.08 | 1.51   | -0.94 | 1.33   | 1.31  | 1.40  | 1.15   | 1.34  | 1.32  |
| UNDERHILL_PROLIFERATION             | -0.84         | 1.44         | -0.66  | -1.37 | 1.13  | -1.48  | -1.19 | -1.46 | 2.12   | 1.75  | 1.43   | 1.22  | 0.52  | 1.70   | 1.63  | 1.17  |
| ICHIBA_GVHD                         | -0.84         | 1.33         | -1.22  | -1.18 | 0.88  | -1.01  | -1.26 | -1.27 | 1.49   | 1.33  | 1.65   | 1.28  | 1.14  | 1.10   | 1.28  | 1.36  |
| MARSHALL_SPLEEN_BAL                 | -0.85         | 1.37         | 0.99   | -1.53 | -1.06 | -1.21  | -1.05 | -1.23 | 1.07   | 1.35  | 1.24   | 1.42  | 1.63  | 1.66   | 1.08  | 1.52  |
| FAB_M7_ROSS                         | -0.85         | 1.24         | -1.17  | -1.14 | 1.07  | -1.26  | -1.43 | -1.18 | 1.46   | 1.42  | 1.02   | 1.15  | 1.33  | 1.03   | 1.33  | 1.16  |
| mtorPathway                         | -0.86         | 1.07         | -1.05  | -1.38 | -1.30 | 1.11   | -1.22 | -1.31 | 1.17   | 1.64  | 0.91   | -1.12 | 1.40  | 1.96   | 1.29  | 1.32  |
| N_Glycan biosynthesis               | -0.87         | 1.17         | -1.11  | -1.24 | -1.47 | -1.14  | -1.11 | 0.86  | 1.20   | 1.27  | 1.22   | 0.75  | 1.15  | 0.88   | 1.21  | 1.65  |
| nos1Pathway                         | -0.89         | 0.75         | 1.05   | -0.98 | -1.42 | -1.41  | -1.38 | -1.19 | 1.22   | -0.85 | 1.46   | 1.52  | 1.40  | 1.05   | 1.34  | -1.11 |
| INSULIN_2F_UP_ROME                  | -0.89         | 1.38         | -1.18  | -1.23 | -1.27 | -1.40  | -1.24 | 0.98  | 1.42   | 1.21  | 1.30   | 1.45  | 1.33  | 1.55   | 1.38  | 1.45  |
| WNT_NCCIT_ALL_UP                    | -0.90         | 1.28         | -1.53  | -1.29 | -1.09 | -1.18  | 0.99  | -1.31 | 1.65   | 1.34  | 1.12   | 0.95  | 1.32  | 1.11   | 1.39  | 1.34  |
| CELL_ADHESION_RECEPTOR_ACTIVITY     | -0.91         | 1.13         | -1.33  | -1.18 | -1.57 | 0.70   | -1.17 | -0.88 | 0.98   | 0.97  | 1.22   | 1.33  | 1.38  | 0.88   | 0.73  | 1.55  |
| ucalpainPathway                     | -0.91         | 0.84         | 0.86   | -1.21 | -1.18 | -1.27  | -1.36 | -1.31 | -0.93  | 1.70  | 1.55   | -0.79 | 1.19  | 1.44   | 0.98  | 1.55  |
| MRNA_BINDING_ACTIVITY               | -0.96         | 1.21         | -1.32  | -1.37 | 0.89  | -1.31  | -1.10 | -1.53 | 1.67   | 1.32  | 1.06   | 1.04  | 1.29  | 0.94   | 0.98  | 1.37  |
| PASSERINI_EM                        | -0.96         | 1.30         | -1.35  | -1.50 | -1.34 | -1.07  | -1.24 | 0.76  | 1.40   | 1.25  | 1.06   | 1.36  | 1.43  | 0.95   | 1.44  | 1.51  |
| metPathway                          | -0.98         | 1.19         | -1.18  | -1.42 | -1.04 | 0.77   | -1.60 | -1.40 | 1.28   | 0.89  | 1.35   | 1.30  | 1.30  | 1.28   | 1.01  | 1.12  |
| KRAS_TOP100_CONTROL_CORDERO         | -0.98         | 1.02         | -1.30  | -1.64 | -1.32 | 0.91   | -1.05 | -1.47 | 1.20   | 1.09  | 1.70   | 1.26  | -1.00 | 1.20   | 1.36  | 1.36  |
| ALMM_UP_ABRAHAM                     | -0.99         | 1.22         | -0.90  | -1.27 | -1.49 | 0.73   | -1.45 | -1.57 | 1.15   | 1.01  | 1.31   | 1.38  | 1.09  | 1.21   | 1.46  | 1.14  |
| Galactose metabolism                | -1.00         | 0.72         | -0.90  | -0.82 | -0.86 | -0.98  | -1.42 | -1.00 | 1.03   | 0.84  | -0.65  | -0.60 | 1.46  | 1.38   | 0.74  | 1.54  |
| PROTEASOME_DEGRADATION              | -1.00         | 1.21         | -1.36  | -1.44 | 0.65  | -1.41  | -1.15 | -1.31 | 1.36   | 1.33  | 1.49   | 1.32  | 1.00  | 1.19   | 0.94  | 1.03  |
| TGF_Beta_Signaling_Pathway          | -1.01         | 1.38         | -1.14  | -1.35 | -1.44 | 0.69   | -1.31 | -1.52 | 1.46   | 1.38  | 1.44   | 1.58  | 1.40  | 1.15   | 1.47  | 1.15  |
| Ovarian_Infertility_Genes           | -1.01         | 1.41         | -1.64  | -1.55 | -1.11 | 1.16   | -1.30 | -1.65 | 1.72   | 1.32  | 1.19   | 1.30  | 1.83  | 1.00   | 1.42  | 1.49  |
| WNT_MOUSEHC11_DOWN                  | -1.05         | 1.28         | 0.99   | -1.42 | -1.67 | -1.53  | -1.25 | -1.41 | 1.33   | 0.98  | 1.33   | 1.31  | 1.20  | 1.36   | 1.27  | 1.44  |
| MOUSE_ACOX1_UP                      | -1.07         | 1.33         | 1.18   | -1.62 | -1.38 | -1.51  | -1.44 | -1.63 | 1.42   | 1.68  | 1.63   | 1.34  | 1.16  | 1.14   | 1.07  | 1.24  |
| ccr5Pathway                         | -1.09         | 1.25         | 0.81   | -1.58 | -1.69 | -1.09  | -1.72 | -1.26 | 1.27   | 0.89  | 1.21   | 1.57  | 1.19  | 1.31   | 0.92  | 1.62  |
| TESTIS_EXPRESSED_GENES              | -1.10         | 1.32         | -0.94  | -1.25 | -1.29 | -0.98  | -0.90 | -1.24 | 0.93   | 1.31  | 1.40   | 1.20  | 1.40  | 1.61   | 1.23  | 1.49  |
| Inflammatory_Response_Pathway       | -1.11         | 1.37         | 0.69   | -1.49 | -1.90 | -1.33  | -1.31 | -1.32 | 1.50   | 1.57  | 1.66   | 0.94  | 0.85  | 1.29   | 1.63  | 1.52  |
| BRENTANI_CYTOSKELETON               | -1.14         | 0.99         | -1.01  | -1.23 | -1.22 | -1.03  | -1.29 | -1.05 | 1.03   | -0.85 | 0.93   | 1.34  | 0.94  | 1.50   | 1.57  | 1.48  |
| Wnt_signaling                       | -1.16         | 1.26         | -1.17  | -1.18 | -1.34 | -1.08  | -1.16 | -1.00 | 1.50   | 1.32  | 1.15   | 1.52  | 1.07  | 1.09   | 1.12  | 1.29  |
| raccycdPathway                      | -1.16         | 0.99         | -1.25  | -1.12 | -0.81 | -1.42  | -1.36 | -1.02 | 1.53   | 1.13  | 1.53   | 1.14  | -0.85 | 0.94   | 1.30  | 1.22  |
| BRENTANI_DNA_MET_AND_MOD            | -1.18         | 1.28         | -0.96  | -1.14 | -1.73 | -1.18  | -0.93 | -1.14 | 1.67   | 1.35  | 1.40   | 1.31  | 1.53  | 1.03   | 0.95  | 0.99  |
| ER_DOWN_FRASOR                      | -1.19         | 1.45         | -1.63  | -1.54 | -1.52 | -1.62  | -1.76 | 0.95  | 1.51   | 1.23  | 1.52   | 1.52  | 1.51  | 1.35   | 1.39  | 1.56  |
| BCELL_ASTIER                        | -1.19         | 1.15         | -1.39  | -1.24 | -1.41 | -1.00  | -1.25 | -0.86 | 1.40   | 1.28  | 1.39   | 0.95  | 1.08  | 1.25   | 0.83  | 0.99  |
| Ribosomal_Proteins                  | -1.20         | 1.62         | -1.74  | -1.34 | 1.01  | -1.66  | -1.64 | -1.83 | 1.70   | 1.72  | 1.61   | 1.63  | 1.58  | 1.71   | 1.50  | 1.52  |
| HYPOXIA_UP_MANALO                   | -1.20         | 1.29         | -1.14  | -1.20 | -1.22 | -1.13  | -1.18 | -1.33 | 1.48   | 1.15  | 1.42   | 1.44  | 1.24  | 1.20   | 1.29  | 1.12  |
| PANCREAS_CHR9_AGUIRRE               | -1.22         | 0.96         | -1.29  | -0.78 | -1.20 | -1.28  | -1.56 | -1.25 | 0.72   | -0.68 | 1.45   | 1.51  | 1.40  | 1.10   | 1.16  | 1.01  |
| EPITHELIAL_UP_ZUCCHI                | -1.23         | 1.40         | -1.42  | -1.21 | -0.99 | -1.42  | -1.04 | -1.32 | 1.30   | 1.43  | 1.68   | 1.35  | 1.10  | 1.49   | 1.48  | 1.35  |
| nkcellsPathway                      | -1.24         | 1.33         | -0.92  | -1.52 | -0.79 | -1.40  | -1.79 | -1.06 | 1.38   | 1.35  | 1.67   | 1.06  | 1.37  | 1.25   | 1.29  | 1.29  |

| NAME                                      | Ave early NES | Ave late NES | 3 week |       |       | 4 week |       |       | 5 week |      | 6 week |       |       | 7 week |       |      |
|-------------------------------------------|---------------|--------------|--------|-------|-------|--------|-------|-------|--------|------|--------|-------|-------|--------|-------|------|
|                                           |               |              | A      | B     | C     | A      | B     | C     | A      | B    | A      | B     | C     | A      | B     | C    |
| ANDROGEN_REGULATED_GENES                  | -1.25         | 1.31         | -1.18  | -1.47 | -1.28 | -1.03  | -1.47 | -1.04 | 1.45   | 1.22 | 1.29   | 1.17  | 0.95  | 1.37   | 1.33  | 1.70 |
| MOUSE_CIP_UP                              | -1.25         | 1.18         | -1.19  | -1.55 | -1.00 | -1.15  | -1.43 | -1.20 | 1.77   | 1.58 | 1.84   | 1.23  | -1.30 | 1.43   | 1.38  | 1.52 |
| IL6_STROMA_UP_CROONQUIST                  | -1.26         | 1.53         | -1.08  | -1.22 | -1.30 | -1.63  | -1.12 | -1.22 | 1.78   | 1.47 | 2.12   | 1.36  | 1.05  | 1.54   | 1.46  | 1.44 |
| NFKB_UP_HINATA                            | -1.27         | 1.25         | -1.21  | -1.52 | -1.35 | -1.16  | -1.21 | -1.17 | 1.31   | 1.03 | 1.35   | 1.05  | 0.99  | 1.24   | 1.45  | 1.61 |
| GNATENKO_PLATELET                         | -1.29         | 1.57         | -0.98  | -1.08 | -1.22 | -1.68  | -1.55 | -1.21 | 1.64   | 1.53 | 1.13   | 1.75  | 1.68  | 1.60   | 1.45  | 1.77 |
| PASSERINI_SIGNAL                          | -1.29         | 1.31         | -0.99  | -1.33 | -1.50 | -1.27  | -1.32 | -1.32 | 1.30   | 1.15 | 1.22   | 1.33  | 1.23  | 1.30   | 1.49  | 1.45 |
| WNT_DB                                    | -1.29         | 0.86         | -1.20  | -1.33 | -1.43 | -0.83  | -1.46 | -1.49 | 1.20   | 0.98 | 1.19   | 1.28  | 0.93  | 1.19   | -1.12 | 1.21 |
| PANCREAS_CHR6_AGUIRRE                     | -1.29         | 1.45         | -1.32  | -0.84 | -1.28 | -1.58  | -1.36 | -1.38 | 1.59   | 1.00 | 1.87   | 1.30  | 1.38  | 1.26   | 1.76  | 1.46 |
| pyk2Pathway                               | -1.31         | 1.36         | -0.74  | -1.53 | -1.46 | -1.22  | -1.64 | -1.28 | 1.28   | 1.12 | 1.52   | 1.53  | 1.50  | 1.34   | 1.13  | 1.46 |
| tnfr1Pathway                              | -1.32         | 0.93         | -1.07  | -1.54 | -1.51 | -0.97  | -1.47 | -1.38 | 1.26   | 1.15 | 1.24   | 1.59  | -1.03 | 0.79   | 1.05  | 1.34 |
| TARTE_MATURE_PC                           | -1.33         | 1.38         | -1.37  | -1.23 | -1.43 | -1.33  | -1.26 | -1.33 | 1.39   | 1.36 | 1.36   | 1.38  | 1.34  | 1.38   | 1.30  | 1.55 |
| Translation_Factors                       | -1.33         | 1.31         | -1.20  | -1.39 | -1.27 | -1.61  | -1.40 | -1.11 | 1.36   | 1.46 | 1.00   | 1.14  | 1.26  | 1.33   | 1.40  | 1.55 |
| BRENTANI_CELL_ADHESION                    | -1.36         | 1.31         | -1.08  | -1.49 | -1.49 | -1.19  | -1.42 | -1.47 | 1.29   | 1.39 | 1.46   | 1.20  | 1.41  | 1.06   | 1.26  | 1.38 |
| Matrix_Metalloproteinases                 | -1.36         | 1.39         | -1.38  | -1.26 | -1.27 | -1.58  | -1.14 | -1.51 | 1.45   | 0.88 | 1.65   | 1.21  | 1.66  | 1.11   | 1.51  | 1.59 |
| MOUSE_MYC_E2F1_UP                         | -1.39         | 1.29         | -1.30  | -1.35 | -1.25 | -1.56  | -1.43 | -1.42 | 1.35   | 1.47 | 1.37   | 1.30  | 1.16  | 1.37   | 1.00  | 1.26 |
| HADDAD_INTVSHI                            | -1.39         | 1.40         | -1.25  | -1.52 | -1.51 | -1.37  | -1.51 | -1.16 | 1.70   | 1.45 | 1.39   | 1.28  | 1.49  | 1.09   | 1.52  | 1.24 |
| PASSERINI_ADHESION                        | -1.39         | 1.40         | -1.21  | -1.40 | -1.55 | -1.14  | -1.61 | -1.42 | 1.26   | 1.18 | 1.45   | 1.69  | 1.36  | 1.53   | 1.27  | 1.48 |
| MOUSE_DENA_UP                             | -1.39         | 1.39         | -0.98  | -1.53 | -1.28 | -1.49  | -1.59 | -1.51 | 1.62   | 1.47 | 1.70   | 1.05  | 1.16  | 1.16   | 1.30  | 1.67 |
| rac1Pathway                               | -1.40         | 1.20         | -1.47  | -1.42 | -1.21 | -1.31  | -1.60 | -1.37 | 1.24   | 1.09 | 1.31   | 1.19  | 1.40  | 0.86   | 1.42  | 1.10 |
| OKUMURA_MC_LPS                            | -1.40         | 1.38         | -1.24  | -1.52 | -1.67 | -1.24  | -1.12 | -1.58 | 1.50   | 1.57 | 1.46   | 1.20  | 1.30  | 1.22   | 1.46  | 1.31 |
| cdc42racPathway                           | -1.40         | 1.15         | -1.35  | -1.58 | -1.28 | -1.34  | -1.52 | -1.33 | 1.46   | 1.51 | 1.84   | -0.85 | 1.33  | 1.13   | 1.52  | 1.21 |
| 2ME2_CHAUHAN                              | -1.41         | 1.40         | -1.16  | -1.43 | -1.64 | -0.95  | -1.49 | -1.77 | 1.24   | 1.26 | 1.18   | 1.83  | 1.43  | 1.87   | 0.98  | 1.43 |
| ACTIN_CYTOSKELETON_REG_BY_RHO_GTPASES     | -1.42         | 1.07         | -1.41  | -1.39 | -1.10 | -1.38  | -1.61 | -1.63 | 1.39   | 1.40 | 1.28   | -0.98 | 1.21  | 1.35   | 1.57  | 1.32 |
| PANCREAS_CHR12_AGUIRRE                    | -1.44         | 1.66         | -1.56  | -1.36 | -1.27 | -1.40  | -1.45 | -1.58 | 1.83   | 1.61 | 1.61   | 1.76  | 1.52  | 1.59   | 1.62  | 1.78 |
| CELL_ADHESION                             | -1.45         | 1.38         | -1.41  | -1.37 | -1.56 | -1.42  | -1.49 | -1.44 | 1.38   | 1.42 | 1.62   | 1.38  | 1.41  | 1.25   | 1.15  | 1.44 |
| ESC_UP_BHATTACHARYA                       | -1.48         | 1.53         | -1.38  | -1.68 | -1.51 | -1.26  | -1.45 | -1.59 | 1.72   | 1.50 | 1.49   | 1.51  | 1.67  | 1.57   | 1.18  | 1.58 |
| SURVIVAL_ALL_POOR                         | -1.48         | 1.48         | -1.45  | -1.33 | -1.48 | -1.47  | -1.55 | -1.62 | 1.49   | 1.49 | 1.50   | 1.56  | 1.61  | 1.47   | 1.29  | 1.46 |
| CELL_ADHESION_MOLECULE_ACTIVITY           | -1.49         | 1.52         | -1.34  | -1.56 | -1.53 | -1.39  | -1.58 | -1.55 | 1.41   | 1.71 | 1.56   | 1.50  | 1.46  | 1.40   | 1.49  | 1.66 |
| MOUSE_MYC_TGFA_UP                         | -1.50         | 1.41         | -1.19  | -1.55 | -1.50 | -1.50  | -1.50 | -1.73 | 1.57   | 1.57 | 1.73   | 1.19  | 1.10  | 1.38   | 1.24  | 1.52 |
| MOUSE_E2F1_UP                             | -1.50         | 1.38         | -1.42  | -1.59 | -1.34 | -1.61  | -1.38 | -1.64 | 1.47   | 1.29 | 1.56   | 1.38  | 1.25  | 1.07   | 1.35  | 1.63 |
| Arginine and proline metabolism           | -1.50         | 1.47         | -1.03  | -1.65 | -1.66 | -1.31  | -1.78 | -1.55 | 1.56   | 1.63 | 1.40   | 1.01  | 1.34  | 1.62   | 1.49  | 1.74 |
| Urea cycle and metabolism of amino groups | -1.50         | 1.54         | -1.05  | -1.89 | -1.53 | -1.18  | -1.70 | -1.65 | 1.60   | 1.55 | 1.72   | 0.81  | 1.54  | 1.70   | 1.81  | 1.57 |
| KRAS_TOP100_KNOCKDOWN_CORDERO             | -1.53         | 1.48         | -1.50  | -1.66 | -1.62 | -1.44  | -1.74 | -1.25 | 1.69   | 1.43 | 1.46   | 1.52  | 1.44  | 1.42   | 1.32  | 1.56 |
| EPITHELIAL_DOWN_ZUCCHI                    | -1.54         | 1.55         | -1.31  | -1.44 | -1.47 | -1.78  | -1.57 | -1.69 | 1.49   | 1.78 | 1.09   | 1.47  | 1.67  | 1.42   | 1.83  | 1.64 |
| TNFA_5ENDOTHELIAL_DOWN                    | -1.55         | 1.70         | -1.55  | -1.43 | -1.49 | -1.87  | -1.70 | -1.28 | 1.83   | 1.54 | 1.69   | 1.79  | 1.41  | 1.59   | 1.76  | 1.95 |
| WNT_MOUSEHC11_UP                          | -1.57         | 1.40         | -1.09  | -1.77 | -1.33 | -1.72  | -1.77 | -1.73 | 1.54   | 1.14 | 1.19   | 1.23  | 1.32  | 1.00   | 1.85  | 1.90 |
| BREAST_CANCER_ESTROGEN_SIGNALLING         | -1.74         | 1.66         | -1.61  | -1.80 | -1.65 | -1.88  | -1.88 | -1.63 | 1.64   | 1.56 | 1.71   | 1.67  | 1.66  | 1.63   | 1.78  | 1.67 |
| EMT_DOWN_JECHLINGER                       | -1.85         | 1.96         | -1.72  | -1.84 | -1.80 | -1.83  | -1.96 | -1.98 | 1.93   | 1.99 | 2.06   | 1.97  | 1.85  | 1.88   | 2.07  | 1.90 |
