# Supplementary material
Source: PubMed Central journal article supplement (PMC3615553)
Supplement: NIHMS449134-supplement-Table_S4.pdf [file NIHMS449134-supplement-Table_S4.pdf]

## Supplementary Table 4

### Involution Day 1 Transcription Factor Binding

| #                                                                                    | Annotation                                                 | Total Genes With Ann | ln(Bayes factor) | neg ln(p value) | FE: neg ln(p value) | FE: neg ln(FDR) |
|--------------------------------------------------------------------------------------|------------------------------------------------------------|----------------------|------------------|-----------------|---------------------|-----------------|
| <b>UP in Wild Type at Involution Day 1 (&gt;2 fold compared to E2F3 Het)</b>         |                                                            |                      |                  |                 |                     |                 |
| 1                                                                                    | E2F_Q6: E2F                                                | 67                   | 5.48             | 9.33            | 9.49                | 3.78            |
| 2                                                                                    | E2F_Q4: E2F                                                | 40                   | 5.02             | 8.98            | 8.82                | 3.78            |
| 3                                                                                    | E2F1_Q6: E2F-1                                             | 52                   | 4.38             | 8.28            | 8.18                | 3.55            |
| 4                                                                                    | OCT1_Q6: octamer-binding factor 1                          | 26                   | 3.23             | 7.1             | 0                   | 0               |
| 5                                                                                    | HNF4_Q1_B: Hepatocyte nuclear factor 4                     | 6                    | 2.51             | 6.27            | 3.22                | 0.53            |
| 6                                                                                    | VMW65_Q6                                                   | 19                   | 2.28             | 6.06            | 0                   | 0               |
| 7                                                                                    | GATA_C: GATA binding site                                  | 22                   | 2.23             | 5.99            | 0                   | 0               |
| 8                                                                                    | HNF1_Q1: hepatic nuclear factor 1                          | 4                    | 2.23             | 5.99            | 0                   | 0               |
| 9                                                                                    | E2F1_Q3_Q1                                                 | 32                   | 2.08             | 5.84            | 5.73                | 1.56            |
| 10                                                                                   | E2F_Q6_Q1                                                  | 17                   | 1.89             | 5.63            | 5.69                | 1.56            |
| 11                                                                                   | TEF_Q6                                                     | 15                   | 1.57             | 5.24            | 0                   | 0               |
| 12                                                                                   | FOXD3_Q1: fork head box D3                                 | 54                   | 1.56             | 5.19            | 0                   | 0               |
| 13                                                                                   | OCT1_Q2: octamer factor 1                                  | 14                   | 1.42             | 5.07            | 0                   | 0               |
| 14                                                                                   | GATA1_Q5: GATA-binding factor 1                            | 9                    | 1.26             | 4.91            | 1.96                | 0               |
| 15                                                                                   | AHR_Q5: aryl hydrocarbon / dioxin receptor                 | 9                    | 1.18             | 4.79            | 1.88                | 0               |
| <b>UP in E2F3 Het at Involution Day 1 (&gt;2 fold compared to Wild Type control)</b> |                                                            |                      |                  |                 |                     |                 |
| 1                                                                                    | SREBP1_Q6                                                  | 40                   | 1.82             | 5.57            | 5.55                | 0.15            |
| 2                                                                                    | IRF7_Q1: interferon regulatory factor 7                    | 36                   | 1.21             | 4.84            | 0                   | 0               |
| 3                                                                                    | HAND1E47_Q1: Hand1:E47 heterodimer                         | 60                   | 1.16             | 4.79            | 4.88                | 0.15            |
| 4                                                                                    | AP1_Q4: activator protein 1                                | 59                   | 1.01             | 4.63            | 0                   | 0               |
| 5                                                                                    | EBF_Q6                                                     | 34                   | 0.84             | 4.4             | 4.51                | 0.15            |
| 6                                                                                    | ARNT_Q1: AhR nuclear translocator homodimers               | 1                    | 0.55             | 4.03            | 0                   | 0               |
| 7                                                                                    | POLY_C: Retroviral Poly A signal                           | 5                    | 0.5              | 3.97            | 4.73                | 0.15            |
| 8                                                                                    | SMAD4_Q6                                                   | 45                   | 0.39             | 3.85            | 3.97                | 0.03            |
| 9                                                                                    | GATA1_Q2: GATA-binding factor 1                            | 40                   | 0.38             | 3.85            | 3.99                | 0.03            |
| 10                                                                                   | BRN2_Q1: POU factor Brn-2                                  | 26                   | 0.33             | 3.79            | 0.01                | 0               |
| 11                                                                                   | FOXO4_Q1: fork head box O4                                 | 49                   | 0.12             | 3.55            | 0.01                | 0               |
| 12                                                                                   | PIT1_Q6                                                    | 55                   | 0.05             | 3.49            | 0.01                | 0               |
| 13                                                                                   | MYOGNF1_Q1: myogenin / nuclear factor 1 or related factors | 26                   | 0.05             | 0               | 3.69                | 0.03            |
| 14                                                                                   | DR3_Q4: direct repeat 3                                    | 19                   | 0.04             | 0               | 3.79                | 0.03            |
| 15                                                                                   | MAZR_Q1: MAZ related factor                                | 44                   | 0.03             | 0               | 3.56                | 0.01            |

#### E2F Target Gene List

1110020C13Rik 1110064N10Rik 2510040D07Rik 9630015D15Rik Actg2 Anxa1 Anxa3 Anxa5 Apobec1 Arf4 Arrdc4 Atf4 Atf5 BC006779 BC018371 Bcar1 Bcl2l1 Brf2 Cap1 Ccna2 Cd24a Cnot2 Cryab Cyr61 FKSG24 Flnb Fosl2 Fus Glipr2 Hist1h2bc Hsp105 Hspb1 Igk-V8 Kdelr3 Klf5 Klf6 Krt1-15 Krt2-8 Lasp1 Lpgat1 Ltbp2 Mapkapk2 Mit1 Mt2 Myc Npn3 Nupl1 Nupr1 Plekha4 Pou3f3 Pscdbp Pvr12 Rhob Riok1 S100a10 S100a11 Slc20a1 Slc30a4 Sprr2h Ssh2 Tcf12 Tead1 Tead3 Tgfr Tnc Tnfrsf12a Tubb6 Ywhah Zfp3612 Zyx

#### E2F Target Gene List From Involution Day 2

Ascc2 Col16a1 Coro1c Gja1 Hist1h2bc Hist1h3i Lgmn Lpl Metrnl Mid1ip1 Pea15 Rnase4 Rpa3 Sgpl1 Tcfe2a 2310046G15Rik 6330406L22Rik Aacs Ascc2 Col16a1 Coro1c Hexb Lgals3 Lpl Mmd Mmp14 Rpa3

## Validated Chromatin IP Target Genes

| Gene          | E2F Sites     | Asynchronous   |         | Apoptosis      |         |
|---------------|---------------|----------------|---------|----------------|---------|
|               | (-250 to +50) | Fold Elevation | p-value | Fold Elevation | p-value |
| Trp53lnp1     | 2             | 2.76           | 0.0125  | 5.56           | 0.0135  |
| MAP3K4        | 1             | 1.81           | 0.0255  | 4.56           | 0.0217  |
| HexB          | 2             | 1.91           | 0.0479  | 2.47           | 0.0141  |
| RhoB          | 2             | 1.25           | NS      | 1.88           | 0.0371  |
| Grim19        | 4             | 1.61           | NS      | 1.60           | NS      |
| MT1           | 4             | 1.34           | NS      | 1.65           | NS      |
| RR2 (Control) | Established   | 6.41           | 0.002   | 3.07           | 0.0169  |
